# Supplementary material
Source: publisher figshare collection journal article supplement (https://acs.figshare.com/ndownloader/files/4102045)

## Iridium-Catalyzed Enantioselective Polyene Cyclization

Michael A. Schafroth, David Sarlah, Simon Krautwald and Erick M. Carreira\*

*Laboratorium für Organische Chemie, ETH Hönggerberg, Wolfgang-Pauli-Strasse 10, CH-8093 Zürich, Switzerland*

E-mail: [carreira@org.chem.ethz.ch](mailto:carreira@org.chem.ethz.ch)

### Supporting Information

#### General Methods:

Unless otherwise noted, all reactions were performed in oven dried glassware under argon. Commercially available chemicals were used as received unless noted otherwise.

<sup>1</sup>H-NMR spectra were recorded on a Bruker Ultrashield 400 MHz in the indicated deuterated solvent. The data is being reported as (s = singlet, d = doublet, t = triplet, m = multiplet or unresolved, br = broad signal, coupling constant(s) in Hz, integration). <sup>13</sup>C-NMR spectra were recorded with 1H-decoupling on a Bruker Ultrashield 100 MHz spectrometer in the indicated deuterated solvent. <sup>31</sup>P-NMR spectra were recorded with <sup>1</sup>H-decoupling on a Bruker Ultrashield 161 MHz spectrometer in the indicated deuterated solvent. Infrared spectra were recorded neat on a Varian 800 FT-IR Scimlar Series spectrophotometer. Optical rotations were measured on a JASCO DIP-1000 digital polarimeter in 10 cm, 1 mL cells, the concentration in g/100 mL and the solvent is given in parentheses. SFC analyses were carried out on a Jasco SFC system with Daicel columns with supercritical CO<sub>2</sub> and MeOH as co-eluent.

High resolution mass spectrometric measurements were performed by the mass spectrometry service of the Laboratorium für Organische Chemie at the ETH Zürich on a VG-TRIBRID spectrometer (EI-MS), Varian IonSpec spectrometer (ESI-MS) or IonSpec Ultima Fourier Transform Mass Spectrometer (MALDI-MS) and are reported as (*m/z*).

**Table of Contents**

|                                                                |                |
|----------------------------------------------------------------|----------------|
| Synthesis of Phosphoramidite Ligand ( <i>R</i> )-L1            | <b>S3</b>      |
| Optimization Studies                                           | <b>S4-S6</b>   |
| Synthesis and Characterization of Starting Materials           | <b>S7-S14</b>  |
| Synthesis and Characterization of Products                     | <b>S15-S22</b> |
| Determination of Absolute Stereochemistry                      | <b>S23</b>     |
| X-ray Structure of <b>2i</b>                                   | <b>S24</b>     |
| SFC traces of racemic and enantioenriched products             | <b>S25-S34</b> |
| <sup>1</sup> H-NMR and <sup>13</sup> C-NMR Spectra of Products | <b>S35-S44</b> |

## Synthesis of the Phosphoramidite Ligand (*R*)-L1<sup>1</sup>

A Schlenk flask under argon was charged with (*R*)-BINOL (10.0 g, 34.9 mmol, 1.00 equiv). PCl<sub>3</sub> (45.8 mL, 524 mmol, 15.0 equiv) and a catalytic amount of *N,N*-Dimethylformamide (81.0 µl, 1.05 mmol, 0.03 equiv) were added and the reaction mixture was heated at 50 °C during 30 min. The initially heterogeneous mixture turned into a homogenous solution. After cooling to 23 °C, the excess PCl<sub>3</sub> was evaporated into a cold-finger-trap *in vacuo* and quenched with saturated aqueous NaHCO<sub>3</sub>, 1 mL toluene was added and remaining PCl<sub>3</sub> was azeotropically removed. The resulting phosphorochloridite (air- and moisture-sensitive!) was redissolved in THF (200 mL). In a separate Schlenk flask under argon, the iminostilbene (7.44 g, 38.5 mmol, 1.1 equiv) was dissolved in THF (200 mL) and deprotonated at –78 °C by slow addition of *n*-BuLi (21.6 mL, 1.05 equiv, 1.6 M solution in hexanes). The resulting deep blue solution was stirred at –78 °C for 1 hour before the phosphorochloridite solution was slowly added via cannula. The resulting mixture was stirred at –78 °C, then warmed to 23 °C and continued to stir during 10 h. After completion of the reaction, as determined by TLC, the solvents were evaporated *in vacuo*. Purification of the residue by flash chromatography (SiO<sub>2</sub>; Hexanes/Toluene 2:1) yielded the desired product as a white powder (10.8 g, 61 %). Keep under inert atmosphere, in the dark, for long-term storage.

<sup>1</sup>H-NMR (400 MHz; CDCl<sub>3</sub>) δ = 7.99 (d, *J* = 8.8 Hz, 1H), 7.91 (d, *J* = 8.2 Hz, 1H), 7.76 (d, *J* = 8.1 Hz, 1H), 7.62 (d, *J* = 8.8 Hz, 1H), 7.45 – 7.34 (m, 3H), 7.30–7.15 (m, 9H), 7.12 – 7.09 (m, 1H), 7.01 – 6.90 (m, 3H), 6.85 (d, *J* = 8.8 Hz, 1H), 6.53 (td, *J* = 7.7, 1.5 Hz, 1H); <sup>13</sup>C NMR (100 MHz; CDCl<sub>3</sub>) δ = 149.95, 149.86, 148.7, 143.1, 142.5, 136.5, 135.2, 132.9, 132.2, 131.53, 131.44, 131.34, 130.31, 130.20, 129.16, 129.07, 129.05, 129.00, 128.97, 128.90, 128.55, 128.40, 128.30, 127.9, 127.1, 126.80, 126.70, 126.15, 126.04, 125.6, 124.8, 124.3, 122.1, 121.5; <sup>31</sup>P NMR (161 MHz; CDCl<sub>3</sub>) δ = 137.88 (s).

<sup>1</sup> C. Defieber, M. A. Ariger, P. Moriel, E. M. Carreira, *Angew. Chem.* **2007**, *119*, 3200–3204; *Angew. Chem. Int. Ed.* **2007**, *46*, 3139–3143.

## Optimization studies

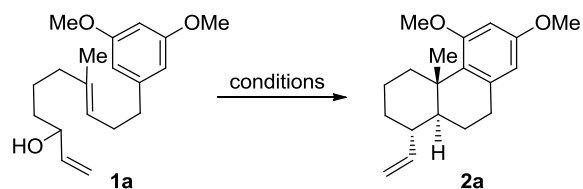

### Effect of phosphoramidate ligand

Standard procedure: Substrate **1a** (0.25 mmol, 1.0 equiv),  $[\{\text{Ir}(\text{cod})\text{Cl}\}_2]$  (4 mol%), **L\*** (16 mol%),  $(\text{BuO})_2\text{P}(\text{O})\text{OH}$  (50 mol%), DCE (1.5 mL), 50 °C, 24h.

**Table S1**

| Entry | Ligand <b>L*</b> | Yield (%) | e.e. (%) |
|-------|------------------|-----------|----------|
| 1     | ( <i>R</i> )-L1  | 49        | 74       |
| 2     | ( <i>S</i> )-L2  | n.r.      | -        |
| 3     | ( <i>R</i> )-L3  | 37        | 21       |
| 4     | ( <i>S</i> )-L4  | 23        | -16      |

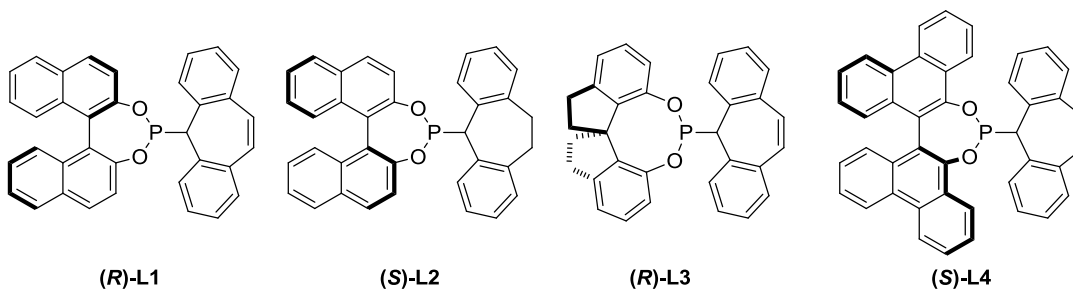

### Effect of promoter

Standard procedure: Substrate **1a** (0.25 mmol, 1.0 equiv), [ $\{\text{Ir}(\text{cod})\text{Cl}\}_2$ ] (4 mol%), (**R**)-**L1** (16 mol%), promoter, DCE (1.5 mL), 25 °C, 24h.

**Table S2**

| Entry | Promoter (mol%)                                           | Yield (%) | e.e. (%) |
|-------|-----------------------------------------------------------|-----------|----------|
| 1     | (BuO) <sub>2</sub> P(O)OH (50)                            | 42        | 89       |
| 2     | TFA (20)                                                  | 53        | 64       |
| 3     | TfOH (20)                                                 | 12        | 81       |
| 4     | C <sub>6</sub> H <sub>5</sub> COOH (50)                   | 37        | 73       |
| 5     | p-NO <sub>2</sub> C <sub>6</sub> H <sub>4</sub> COOH (50) | 40        | 75       |
| 6     | CCl <sub>3</sub> COOH (50)                                | 39        | 68       |
| 7     | HCOOH (50)                                                | n.r.      | -        |
| 8     | CH <sub>3</sub> COOH (50)                                 | 28        | 85       |
| 9     | Bi(OTf) <sub>3</sub> (10)                                 | 71        | 96       |
| 10    | Sc(OTf) <sub>3</sub> (10)                                 | 91        | 80       |
| 11    | In(OTf) <sub>3</sub> (10)                                 | 84        | 88       |
| 12    | Yb(OTf) <sub>3</sub> (10)                                 | 79        | 94       |
| 13    | Zn(OTf) <sub>2</sub> (10)                                 | 72        | >99.5    |
| 14    | Zn(OTf) <sub>2</sub> (20)                                 | 90        | >99.5    |
| 15    | Zn(OTf) <sub>2</sub> (50)                                 | 83        | 99       |

### Effect of temperature

Standard procedure: Substrate **1a** (0.25 mmol, 1.0 equiv), [ $\{\text{Ir}(\text{cod})\text{Cl}\}_2$ ] (4 mol%), (**R**)-**L1** (16 mol%), Bi(OTf)<sub>3</sub> (10 mol%), DCE (1.5 mL), temperature, 24h.

**Table S3**

| Entry | Temperature (°C) | Yield (%) | e.e. (%) |
|-------|------------------|-----------|----------|
| 1     | 4                | 64        | 96       |
| 2     | 25               | 71        | 89       |
| 3     | 50               | 75        | 54       |

**Effect of solvent**

Standard procedure: Substrate **1a** (0.25 mmol, 1.0 equiv), [ $\text{Ir}(\text{cod})\text{Cl}$ ]<sub>2</sub> (4 mol%), (**R**)-**L1** (16 mol%),  $\text{Zn}(\text{OTf})_2$  (10 mol%), solvent (1.5 mL), 25 °C, 24h.

**Table S4**

| Entry | Solvent     | Yield (%) | e.e. (%) |
|-------|-------------|-----------|----------|
| 1     | DCE         | 90        | >99.5    |
| 2     | 1,4-Dioxane | 8         | >99.5    |
| 3     | DMF         | n.r.      | -        |
| 4     | Benzene     | 28        | 94       |
| 5     | MeCN        | 18        | 99       |
| 6     | THF         | 14        | 99.5     |

**Effect of concentration**

Standard procedure: Substrate **1a** (0.25 mmol, 1.0 equiv), [ $\text{Ir}(\text{cod})\text{Cl}$ ]<sub>2</sub> (4 mol%), (**R**)-**L1** (16 mol%),  $\text{Zn}(\text{OTf})_2$  (10 mol%), DCE, 25 °C, 24h.

**Table S5**

| Entry | Concentration (M) | Yield (%) | e.e. (%) |
|-------|-------------------|-----------|----------|
| 1     | 0.08              | 59        | >99.5    |
| 2     | 0.17              | 72        | >99.5    |
| 3     | 0.25              | 61        | >99.5    |

## Synthesis and Characterization of Starting Materials

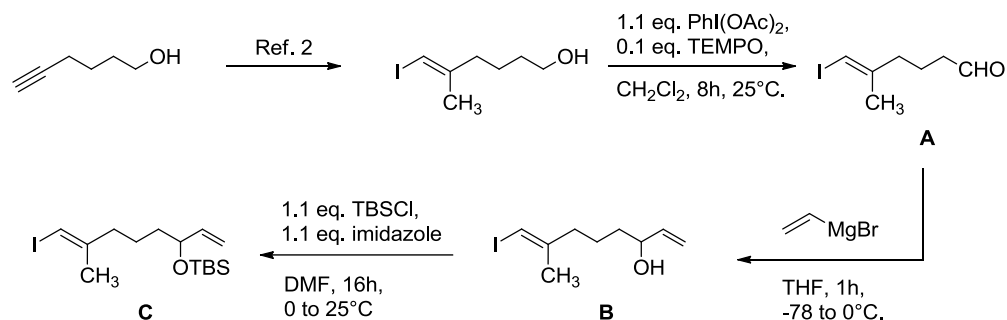

### Synthesis of (E)-6-iodo-5-methylhex-5-enal (**A**)

To a solution of (E)-6-iodo-5-methylhex-5-en-1-ol<sup>2</sup> (7.20 g, 30.0 mmol, 1.0 equiv) in CH<sub>2</sub>Cl<sub>2</sub> (150 mL) was added TEMPO (0.47 g, 3.0 mmol, 0.1 equiv) followed by PhI(OAc)<sub>2</sub> (9.66 g, 33.0 mmol, 1.1 equiv) and the reaction mixture was stirred at room temperature for 8h. Upon consumption of the starting material (TLC, 20% ether in hexanes) the reaction was quenched by addition of saturated aqueous Na<sub>2</sub>S<sub>2</sub>O<sub>3</sub> and saturated aqueous NaHCO<sub>3</sub> solution (1:1, 200 mL). The aqueous layer was separated and extracted with diethyl ether (3 × 100 mL). The combined organic layers were dried over MgSO<sub>4</sub>, concentrated under reduced pressure and purified by flash chromatography (SiO<sub>2</sub>; hexanes/diethyl ether 5:1) to give the title compound as a colorless oil (5.92 g, 83 %).

<sup>1</sup>H NMR (400 MHz, CDCl<sub>3</sub>)  $\delta$  = 9.76 (t,  $J$  = 1.5 Hz, 1H), 5.91 (h,  $J$  = 1.2 Hz, 1H), 2.42 (td,  $J$  = 7.4, 1.5 Hz, 2H), 2.24 (td,  $J$  = 7.4, 1.2 Hz, 2H), 1.82 (d,  $J$  = 1.0 Hz, 3H), 1.81 – (m, 2H); <sup>13</sup>C NMR (100 MHz, CDCl<sub>3</sub>)  $\delta$  = 201.9, 147.0, 75.7, 43.0, 38.7, 23.7, 20.0; IR ( $\nu_{max}$ /cm<sup>-1</sup>): 3056, 2938, 2818, 2721, 2285, 1723, 1276, 1142, 913, 747, 630; EI-MS calcd for C<sub>7</sub>H<sub>11</sub>IO (M<sup>+</sup>) 237.9855; found 237.9855.

### Synthesis of (E)-8-iodo-7-methylocta-1,7-dien-3-ol (**B**)

To a solution of **A** (5.10 g, 21.4 mmol, 1.0 equiv) in THF (140 mL) was added vinylmagnesium bromide (1.0 M in THF, 22.5 mL, 22.5 mmol, 1.05 equiv) at -78 °C. The reaction mixture was allowed to warm to 0 °C and was quenched by slow addition of saturated aqueous NH<sub>4</sub>Cl (100 mL). The aqueous layer was separated from the organic phase and further extracted with diethyl ether (3 ×

<sup>2</sup> R. K. Thalji and W. R. Roush, *J. Am. Chem. Soc.*, **2005**, 127, 16778–16779

100 mL). The combined organic layers were dried over  $\text{MgSO}_4$ , concentrated under reduced pressure and purified by flash chromatography ( $\text{SiO}_2$ ; hexanes/diethyl ether 6:1) to give the title compound as a colorless oil (4.81 g, 84 %).

$^1\text{H}$  NMR (400 MHz,  $\text{CDCl}_3$ )  $\delta$  = 5.92 – 5.78 (m, 2H), 5.22 (dt,  $J$  = 17.2, 1.4 Hz, 1H), 5.12 (dt,  $J$  = 10.4, 1.4 Hz, 1H), 4.17 – 4.00 (m, 1H), 2.29 – 2.19 (m, 2H), 1.83 (d,  $J$  = 1.1 Hz, 3H), 1.65 – 1.39 (m, 4H);  $^{13}\text{C}$  NMR (100 MHz,  $\text{CDCl}_3$ )  $\delta$  = 147.9, 141.1, 115.0, 74.9, 73.1, 39.5, 36.3, 23.9, 23.5; IR ( $\nu_{\text{max}}/\text{cm}^{-1}$ ): 3366, 2937, 2824, 2286, 1429, 1274, 1141, 990, 913, 747, 630.

### Synthesis of (*E*)-*tert*-butyl((8-iodo-7-methylocta-1,7-dien-3-yl)oxy)dimethylsilane (C)

To a solution of **B** (4.75 g, 17.8 mmol, 1.0 equiv) in DMF (40 mL) was added imidazole (1.35 g, 19.8 mmol, 1.1 equiv) followed by TBSCl (3.00 g, 19.8 mmol, 1.1 equiv) at 0 °C. The reaction mixture was allowed to warm to room temperature and was further stirred for 16 h. Upon consumption of the starting material (TLC, hexanes/diethyl ether 4:1) the reaction mixture was diluted with saturated aqueous  $\text{NH}_4\text{Cl}$  solution (200 mL) and extracted with diethyl ether (3 × 100 mL). The combined organic layers were washed with LiCl solution (5% aqueous, 100 mL), dried over  $\text{MgSO}_4$  and concentrated under reduced pressure. The residue was purified by flash chromatography ( $\text{SiO}_2$ ; hexanes) to give the title compound as a colorless oil (5.75 g, 84 %).

$^1\text{H}$  NMR (400 MHz,  $\text{CDCl}_3$ )  $\delta$  = 5.86 (q,  $J$  = 1.2 Hz, 1H), 5.77 (ddd,  $J$  = 17.2, 10.4, 6.0 Hz, 1H), 5.13 (dt,  $J$  = 17.2, 1.7 Hz, 1H), 5.03 (ddd,  $J$  = 10.4, 1.7, 1.2 Hz, 1H), 4.09 (tdd,  $J$  = 6.0, 4.3, 1.5 Hz, 1H), 2.25 – 2.15 (m, 2H), 1.81 (d,  $J$  = 1.1 Hz, 3H), 1.57 – 1.39 (m, 4H), 0.90 (s, 9H), 0.05 (s, 3H), 0.03 (s, 3H);  $^{13}\text{C}$  NMR (100 MHz,  $\text{CDCl}_3$ )  $\delta$  = 148.1, 141.7, 113.9, 74.7, 73.6, 39.6, 37.41, 26.0, 23.9, 23.2, 18.4, -4.2, -4.7; IR ( $\nu_{\text{max}}/\text{cm}^{-1}$ ): 2928, 2856, 1643, 1471, 1461, 1360, 1250, 1123, 1082, 1027, 1005.



## Synthesis of Polyene Substrates

**(E)-10-(3,5-dimethoxyphenyl)-7-methyldeca-1,7-dien-3-ol (1a)**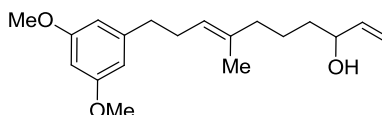

The title compound was prepared following general procedure A from 3,5-dimethoxystyrene<sup>4</sup> in 74 % yield.

<sup>1</sup>H NMR (400 MHz, CDCl<sub>3</sub>)  $\delta$  = 6.36 (d,  $J$  = 2.3 Hz, 2H), 6.30 (t,  $J$  = 2.3 Hz, 1H), 5.85 (ddd,  $J$  = 17.0, 10.4, 6.2 Hz, 1H), 5.25 – 5.14 (m, 2H), 5.10 (dt,  $J$  = 10.4, 1.3 Hz, 1H), 4.12 – 4.04 (m, 1H), 3.78 (s, 6H), 2.58 (dd,  $J$  = 8.7, 6.7 Hz, 2H), 2.30 (q,  $J$  = 7.5 Hz, 2H), 2.05 – 1.93 (m, 2H), 1.59 – 1.36 (m, 8H); <sup>13</sup>C NMR (100 MHz, CDCl<sub>3</sub>)  $\delta$  = 160.8, 145.0, 141.4, 135.7, 124.1, 114.7, 106.8, 97.8, 73.3, 55.4, 39.6, 36.7, 36.5, 29.8, 23.6, 16.0; IR ( $\nu_{max}$ /cm<sup>-1</sup>): 3383, 2934, 2837, 1595, 1460, 1427, 1347, 1313, 1292, 1204, 1149, 1067; ESI-MS calcd for C<sub>19</sub>H<sub>29</sub>O<sub>3</sub> (MH<sup>+</sup>) 305.2111; found 305.2112.

**(E)-10-(3,4-dimethoxyphenyl)-7-methyldeca-1,7-dien-3-ol (1b)**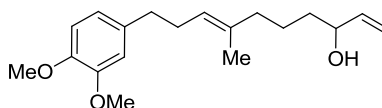

The title compound was prepared following general procedure A from 3,4-dimethoxystyrene in 84 % yield.

<sup>1</sup>H NMR (400 MHz, CDCl<sub>3</sub>)  $\delta$  = 6.81 – 6.77 (m, 1H), 6.75 – 6.67 (m, 2H), 5.85 (ddd,  $J$  = 17.2, 10.5, 6.2 Hz, 1H), 5.28 – 5.13 (m, 2H), 5.10 (dt,  $J$  = 10.5, 1.4 Hz, 1H), 4.09 (qt,  $J$  = 5.1, 1.3 Hz, 1H), 3.87 (s, 3H), 3.85 (s, 3H), 2.61 – 2.55 (m, 2H), 2.28 (q,  $J$  = 7.4 Hz, 2H), 2.03 – 1.94 (m, 2H), 1.55 (d,  $J$  = 1.4 Hz, 3H), 1.52 – 1.37 (m, 4H); <sup>13</sup>C NMR (100 MHz, CDCl<sub>3</sub>)  $\delta$  = 148.8, 147.2, 141.4, 135.6, 135.2, 124.1, 120.4, 114.7, 112.0, 111.3, 73.3, 56.1, 56.0, 39.6, 36.6, 35.8, 30.2, 23.7, 16.0; IR ( $\nu_{max}$ /cm<sup>-1</sup>): 3512, 2934, 2835, 1590, 1515, 1464, 1262, 1235, 1154; ESI-MS calcd for C<sub>19</sub>H<sub>29</sub>O<sub>3</sub> (MH<sup>+</sup>) 305.2111; found 305.2110.

<sup>4</sup> Nicolaou, K. C. et. al. *Chem. Eur. J.*, **1999**, 5, 2602–2621.

**(E)-10-(3-methoxyphenyl)-7-methyldeca-1,7-dien-3-ol (1c)**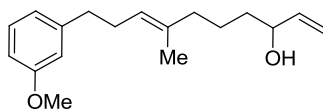

The title compound was prepared following general procedure A from 3-methoxystyrene in 75 % yield.

$^1\text{H}$  NMR (400 MHz,  $\text{CDCl}_3$ )  $\delta$  = 7.22 – 7.15 (m, 1H), 6.82 – 6.70 (m, 3H), 5.85 (ddd,  $J$  = 17.2, 10.4, 6.2 Hz, 1H), 5.25 – 5.14 (m, 2H), 5.10 (dt,  $J$  = 10.4, 1.4 Hz, 1H), 4.13 – 4.04 (br, 1H), 3.80 (s, 3H), 2.62 (dd,  $J$  = 8.7, 6.7 Hz, 2H), 2.30 (q,  $J$  = 7.5 Hz, 2H), 2.03 – 1.95 (m, 2H), 1.62 – 1.34 (m, 8H);  $^{13}\text{C}$  NMR (100 MHz,  $\text{CDCl}_3$ )  $\delta$  = 159.7, 144.2, 141.4, 135.7, 129.3, 124.1, 121.1, 114.7, 114.5, 111.0, 73.3, 55.3, 39.6, 36.7, 36.3, 29.9, 23.6, 15.9; IR ( $\nu_{\text{max}}/\text{cm}^{-1}$ ): 3381, 3090, 3035, 2935, 1814, 1601, 1584, 1478, 1437, 1260, 1152, 1035; ESI-MS calcd for  $\text{C}_{18}\text{H}_{26}\text{NaO}_2$  ( $\text{MNa}^+$ ) 297.1825; found 297.1826.

**(E)-7-methyl-10-(1-(phenylsulfonyl)-1H-pyrrol-2-yl)deca-1,7-dien-3-ol (1d)**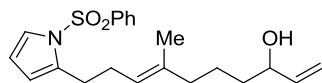

The title compound was prepared following general procedure A from 1-(phenylsulfonyl)-2-vinyl-1H-pyrrole in 79 % yield.

$^1\text{H}$  NMR (400 MHz,  $\text{CDCl}_3$ )  $\delta$  = 7.89 – 7.79 (m, 2H), 7.64 – 7.54 (m, 1H), 7.54 – 7.41 (m, 2H), 7.07 (dd,  $J$  = 3.2, 2.2 Hz, 1H), 6.92 – 6.88 (m, 1H), 6.16 (dd,  $J$  = 3.2, 1.6 Hz, 1H), 5.86 (ddd,  $J$  = 17.2, 10.4, 6.2 Hz, 1H), 5.22 (dt,  $J$  = 17.2, 1.4 Hz, 1H), 5.14 – 5.04 (m, 2H), 4.15 – 4.06 (br, 1H), 2.45 – 2.35 (m, 2H), 2.26 – 2.11 (m, 2H), 1.96 (m, 2H), 1.54 – 1.33 (m, 8H);  $^{13}\text{C}$  NMR (100 MHz,  $\text{CDCl}_3$ )  $\delta$  = 141.4, 139.4, 135.8, 133.7, 129.9, 129.4, 126.8, 123.9, 121.0, 117.5, 115.1, 114.7, 73.3, 39.6, 36.7, 28.5, 27.1, 23.7, 16.0; IR ( $\nu_{\text{max}}/\text{cm}^{-1}$ ): 3411, 2930, 1448, 1368, 1174, 1102, 1060, 913, 774, 729; Maldi-MS calcd for  $\text{C}_{21}\text{H}_{28}\text{NO}_3\text{S}$  ( $\text{MH}^+$ ) 374.1784; found 374.1784.

**(E)-7-methyl-10-(1-(phenylsulfonyl)-1H-pyrrol-3-yl)deca-1,7-dien-3-ol (1e)**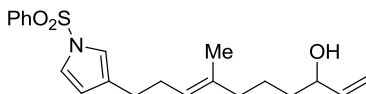

The title compound was prepared following general procedure A from 1-(phenylsulfonyl)-3-vinyl-1H-pyrrole<sup>5</sup> in 78 % yield.

<sup>1</sup>H NMR (400 MHz, CDCl<sub>3</sub>)  $\delta$  = 7.80 – 7.75 (m, 2H), 7.64 – 7.59 (m, 1H), 7.56 – 7.49 (m, 2H), 7.32 (ddd,  $J$  = 3.3, 1.7, 0.5 Hz, 1H), 6.23 (t,  $J$  = 3.3 Hz, 1H), 6.05 – 6.00 (m, 1H), 5.89 (ddd,  $J$  = 17.2, 10.4, 6.2 Hz, 1H), 5.25 (dt,  $J$  = 17.2, 1.4 Hz, 1H), 5.17 – 5.07 (m, 2H), 4.15 – 4.06 (br, 1H), 2.75 – 2.67 (m, 2H), 2.32 – 2.22 (m, 2H), 2.05 – 1.96 (m, 2H), 1.63 – 1.32 (m, 8H); <sup>13</sup>C NMR (100 MHz, CDCl<sub>3</sub>)  $\delta$  = 141.4, 139.4, 135.8, 133.7, 129.9, 129.4, 126.8, 123.9, 121.0, 117.5, 115.1, 114.7, 73.3, 39.6, 36.7, 28.5, 27.1, 23.7, 16.0; IR ( $\nu_{max}$ /cm<sup>-1</sup>): 3389, 2930, 2855, 1448, 1364, 1176, 913, 744, 686, 631; Maldi-MS calcd for C<sub>21</sub>H<sub>28</sub>NO<sub>3</sub>S (MH<sup>+</sup>) 374.1784; found 374.1785.

**(E)-tert-butyl 3-(8-hydroxy-4-methyldeca-3,9-dien-1-yl)-1H-indole-1-carboxylate (1f)**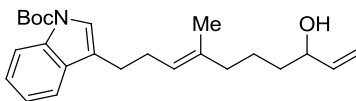

The title compound was prepared following general procedure A from *tert*-butyl 3-vinyl-1H-indole-1-carboxylate<sup>5</sup> in 71 % yield.

<sup>1</sup>H NMR (400 MHz, CDCl<sub>3</sub>)  $\delta$  = 8.13 (d,  $J$  = 7.7 Hz, 1H), 7.56 (ddd,  $J$  = 7.7, 1.4, 0.7 Hz, 1H), 7.39 (s, 1H), 7.33 (ddd,  $J$  = 8.3, 7.2, 1.3 Hz, 1H), 7.26 (ddd,  $J$  = 7.7, 7.2, 1.1 Hz, 1H), 5.88 (ddd,  $J$  = 17.2, 10.4, 6.2 Hz, 1H), 5.30 – 5.20 (m, 2H), 5.13 (ddd,  $J$  = 10.4, 1.6, 1.2 Hz, 1H), 4.12 (q,  $J$  = 6.3 Hz, 1H), 2.79 – 2.67 (m, 2H), 2.43 (m, 2H), 2.10 – 1.98 (m, 2H), 1.70 (s, 9H), 1.66 – 1.60 (m, 3H), 1.57 – 1.28 (m, 4H); <sup>13</sup>C NMR (100 MHz, CDCl<sub>3</sub>)  $\delta$  = 141.3, 135.7, 124.19, 124.17, 122.4, 122.3, 121.1, 119.0, 115.2, 114.6, 73.2, 54.0, 39.5, 36.6, 29.2, 28.3, 27.6, 25.1, 23.5, 20.8, 15.9, 14.1; IR ( $\nu_{max}$ /cm<sup>-1</sup>): 3441, 2932, 2859, 2050, 1731, 1454, 1379,

<sup>5</sup> Xiao, D.; Ketcha, D. M. *J. Het. Chem.* **1995**, 32, 499–503.

1308, 1256, 1157, 1084; ESI-MS calcd for  $C_{24}H_{33}NNaO_3$  ( $MNa^+$ ) 406.2353; found 406.2347.

**(*E*)-10-(1*H*-indol-1-yl)-7-methyldeca-1,7-dien-3-ol (1g)**

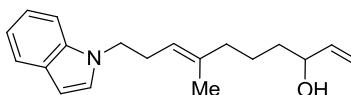

The title compound was prepared following general procedure A from *N*-vinylindole<sup>6</sup> in 68 % yield.

<sup>1</sup>H NMR (400 MHz,  $CDCl_3$ )  $\delta$  = 7.63 (dt,  $J$  = 7.9, 1.0 Hz, 1H), 7.36 (dd,  $J$  = 8.3, 1.0 Hz, 1H), 7.20 (ddd,  $J$  = 8.3, 7.0, 1.2 Hz, 1H), 7.12 – 7.06 (m, 2H), 6.47 (dd,  $J$  = 3.3, 0.8 Hz, 1H), 5.84 (ddd,  $J$  = 17.0, 10.4, 6.2 Hz, 1H), 5.22 (dt,  $J$  = 17.2, 1.4 Hz, 1H), 5.17 – 5.08 (m, 2H), 4.16 – 4.02 (m, 3H), 2.52 (q,  $J$  = 7.2 Hz, 2H), 2.01 – 1.92 (m, 2H), 1.51 – 1.33 (m, 7H); <sup>13</sup>C NMR (100 MHz,  $CDCl_3$ )  $\delta$  = 141.3, 138.3, 136.1, 128.7, 127.9, 121.4, 121.0, 120.4, 119.3, 114.8, 109.5, 101.0, 73.3, 46.4, 39.5, 36.6, 29.1, 23.5, 15.9; IR ( $\nu_{max}/cm^{-1}$ ): 3364, 2932, 2834, 1612, 1510, 1462, 1399, 1335, 1314, 1255, 1240, 1203, 1163, 1122, 1065, 1012; ESI-MS calcd for  $C_{19}H_{25}NNaO$  ( $MNa^+$ ) 306.1828; found 306.1824.

**(*E*)-10-(benzofuran-2-yl)-7-methyldeca-1,7-dien-3-ol (1h)**

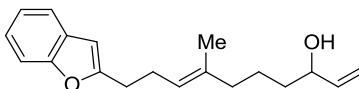

The title compound was prepared following general procedure A from 2-vinylbenzofuran<sup>7</sup> in 84 % yield.

<sup>1</sup>H NMR (400 MHz,  $CDCl_3$ )  $\delta$  = 7.53 – 7.48 (m, 1H), 7.46 – 7.42 (m, 1H), 7.27 – 7.16 (m, 2H), 6.40 (d,  $J$  = 1.0 Hz, 1H), 5.85 (ddd,  $J$  = 17.2, 10.4, 6.2 Hz, 1H), 5.26 – 5.19 (m, 2H), 5.12 (ddd,  $J$  = 10.4, 1.2 Hz, 1H), 4.22 – 4.02 (m, 1H), 2.91 – 2.76 (m, 2H), 2.52 – 2.41 (m, 2H), 2.06 – 1.98 (m, 2H), 1.65 – 1.59 (m, 4H), 1.52 – 1.40 (m, 3H); <sup>13</sup>C NMR (100 MHz,  $CDCl_3$ )  $\delta$  = 159.2, 154.7, 141.2, 136.3, 129.0, 123.2, 123.1, 122.4, 120.2, 114.6, 110.7, 102.0, 73.2, 39.4, 36.5, 28.7,

<sup>6</sup> D. Bogdal, K. Jaskot, *Syn. Comm.* **2000**, 30, 3341–3352.

<sup>7</sup> Marrocchi, A.; Minuti, L.; Taticchi, A.; Scheeren, H. W. *Tetrahedron* **2001**, 57, 4959–4965.

26.2, 23.4, 15.8; IR ( $\nu_{\max}/\text{cm}^{-1}$ ): 3366, 2930, 2831, 1455, 1253, 1168, 913, 744, 631; ESI-MS calcd for  $\text{C}_{19}\text{H}_{24}\text{NaO}_2$  ( $\text{MNa}^+$ ) 307.1669; found 307.1671.

**(7*E*,11*E*)-14-(3,5-dimethoxyphenyl)-7,11-dimethyltetradeca-1,7,11-trien-3-ol (1i)**

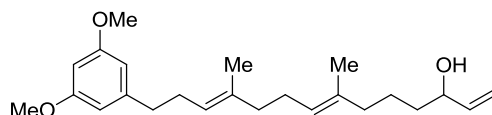

The title compound was prepared following general procedure A from (*E*)-1,3-dimethoxy-5-(4-methylhexa-3,5-dien-1-yl)benzene<sup>8</sup> in 64 % yield.

$^1\text{H}$  NMR (400 MHz,  $\text{CDCl}_3$ )  $\delta$  = 6.40 – 6.38 (m, 2H), 6.33 (t,  $J$  = 2.3 Hz, 1H), 5.98 – 5.81 (m, 1H), 5.30 – 5.18 (m, 2H), 5.18 – 5.10 (m, 2H), 4.17 – 4.08 (br, 1H), 3.81 (s, 6H), 2.60 (dd,  $J$  = 9.2, 6.6 Hz, 2H), 2.39 – 2.28 (m, 2H), 2.15 – 2.05 (m, 2H), 2.06 – 1.97 (m, 5H), 1.61 (dd,  $J$  = 1.5, 0.7 Hz, 6H), 1.57 – 1.46 (m, 3H);  $^{13}\text{C}$  NMR (100 MHz,  $\text{CDCl}_3$ )  $\delta$  = 160.7, 144.9, 141.3, 135.8, 134.8, 124.5, 123.6, 114.6, 106.5, 97.7, 73.2, 55.3, 39.7, 39.5, 36.6, 36.5, 29.7, 26.6, 23.6, 16.1, 15.8; IR ( $\nu_{\max}/\text{cm}^{-1}$ ): 3376, 2935, 2838, 1596, 1459, 1293, 1205, 1152, 1068, 912, 742, 630; ESI-MS calcd for  $\text{C}_{24}\text{H}_{37}\text{O}_3$  ( $\text{MH}^+$ ) 373.2737; found 373.2735.

<sup>8</sup> Ota, K.; Kurokawa, T.; Kawashima, E.; Miyaoka, H. *Tetrahedron* **2009**, 65, 8668-8676.

## General Procedure B

### Polyene Cyclizations of Allylic Alcohols

[Ir(cod)<sub>2</sub>Cl]<sub>2</sub> (13.4 mg, 20.0 μmol, 0.04 equiv) and ligand (**R**)-**L** (40.8 mg, 80.0 μmol, 0.16 equiv) were placed in a screw capped vial (5.0 mL) or flask with a magnetic stir bar. Commercial grade 1,2-dichloroethane (3 mL) was added and the reaction vessel was quickly purged with nitrogen, closed and stirred vigorously for 15 mins during which the solution turned dark red. Allylic alcohol (0.5 mmol, 1.0 equiv) and Zn(OTf)<sub>2</sub> (36.4 mg, 0.1 mmol, 0.2 equiv) were added to the reaction mixture resulting in an orange solution. The reaction was stirred at room temperature for 24 h. The solvent was removed under reduced pressure and the residue was purified by flash chromatography (SiO<sub>2</sub>; hexanes/CH<sub>2</sub>Cl<sub>2</sub> mixture as the eluent) to afford the product.

### (1*S*,4*aS*,10*aS*)-5,7-dimethoxy-4*a*-methyl-1-vinyl-1,2,3,4,4*a*,9,10,10*a*-octahydrophenanthrene (**2a**)

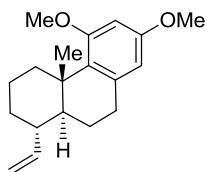

Following general procedure B on a double scale by using (*E*)-10-(3,5-dimethoxyphenyl)-7-methyldeca-1,7-dien-3-ol (**1a**, 1 mmol) afforded the title compound as a colorless oil in 90 % yield. The enantiomeric excess was found to be >99.5% (OJ-H; flow: 1.50 mL/min; 14.41 min (major), 16.85 min (minor); 99% CO<sub>2</sub>, 1% MeOH at 100 bar, 40 °C).

<sup>1</sup>H NMR (400 MHz, CDCl<sub>3</sub>) δ = 6.29 (d, *J* = 2.6 Hz, 1H), 6.20 (d, *J* = 2.5 Hz, 1H), 5.60 (ddd, *J* = 17.1, 10.1, 8.9 Hz, 1H), 5.04 – 4.92 (m, 2H), 3.76 (d, *J* = 1.5 Hz, 6H), 3.11 – 3.01 (m, 1H), 2.86 – 2.67 (m, 2H), 2.18 (tdd, *J* = 11.9, 9.2, 3.8 Hz, 1H), 1.83 – 1.56 (m, 4H), 1.43 – 1.11 (m, 7H); <sup>13</sup>C NMR (100 MHz, CDCl<sub>3</sub>) δ = 160.1, 158.0, 144.5, 139.3, 128.7, 113.9, 105.1, 97.7, 55.2, 55.2, 49.6, 42.9, 38.2, 35.9, 34.4, 32.8, 22.1, 21.8, 17.9; IR (*v*<sub>max</sub>/cm<sup>-1</sup>): 3047, 2932, 2834, 1477, 1297, 1159, 673, 630; MALDI-MS calcd for C<sub>19</sub>H<sub>26</sub>O<sub>2</sub> (M<sup>+</sup>) 286.1927; found 286.1927; [α]<sub>D</sub><sup>25</sup> = +149.6 (*c* = 1.0, CHCl<sub>3</sub>).

**(1*S*,4*aS*,10*aS*)-7,8-dimethoxy-4*a*-methyl-1-vinyl-1,2,3,4,4*a*,9,10,10*a*-octahydrophenanthrene (2*b*)**

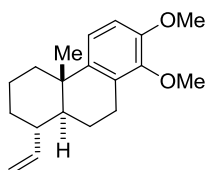

Following general procedure B by using (*E*)-10-(3,4-dimethoxyphenyl)-7-methyldeca-1,7-dien-3-ol (**1b**) afforded the title compound as a colorless oil in 71 % yield. The enantiomeric ratio was found to be >99.5% (OJ-H; flow: 1.50 mL/min; 27.88 min (minor), 33.84 min (major); 99% CO<sub>2</sub>, 1% MeOH at 100 bar, 40 °C).

<sup>1</sup>H NMR (400 MHz, CDCl<sub>3</sub>) δ = 6.80 (s, 1H), 6.54 (s, 1H), 5.60 (ddd, *J* = 17.1, 10.1, 8.9 Hz, 1H), 5.08 – 4.96 (m, 2H), 3.84 (d, *J* = 8.9 Hz, 6H), 2.82 – 2.67 (m, 2H), 2.21 (dq, *J* = 12.6, 2.9 Hz, 1H), 2.07 (tdd, *J* = 12.4, 8.9, 3.6 Hz, 1H), 1.92 – 1.81 (m, 1H), 1.79 – 1.66 (m, 3H), 1.55 – 1.17 (m, 4H), 1.13 (d, *J* = 0.7 Hz, 3H); <sup>13</sup>C NMR (100 MHz, CDCl<sub>3</sub>) δ = 147.1, 147.0, 143.9, 140.3, 127.9, 114.2, 111.8, 108.4, 56.2, 55.9, 46.5, 43.4, 38.2, 36.9, 34.0, 29.4, 22.9, 22.6, 21.8; IR (*ν*<sub>max</sub>/cm<sup>-1</sup>): 3061, 2927, 2848, 1508, 1465, 1256, 1152, 764, 630; ESI-MS calcd for C<sub>19</sub>H<sub>27</sub>O<sub>2</sub> (MH<sup>+</sup>) 287.2006; found 287.2009; [α]<sub>D</sub><sup>25</sup> = +118.6 (*c* = 0.5, CHCl<sub>3</sub>).

**(1*S*,4*aS*,10*aS*)-5-methoxy-4*a*-methyl-1-vinyl-1,2,3,4,4*a*,9,10,10*a*-octahydrophenanthrene (2*c'*) and (1*S*,4*aS*,10*aS*)-7-methoxy-4*a*-methyl-1-vinyl-1,2,3,4,4*a*,9,10,10*a*-octahydrophenanthrene (2*c*)**

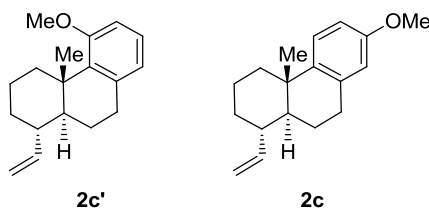

Following general procedure B by using (*E*)-10-(3-methoxyphenyl)-7-methyldeca-1,7-dien-3-ol (**1c**) afforded the title compounds **2c'** and **2c** in a 1:2 ratio and 69 % overall yield. Separation of resulting regioisomers proved difficult by using normal



silica, however AgNO<sub>3</sub>-impregnated SiO<sub>2</sub> partially resolve the mixture. The enantiomeric excess was found to be >99.5% for **2c** (OJ-H; flow: 2.00 mL/min; 11.41 min (major), 13.44 min (minor); 99% CO<sub>2</sub>, 1% MeOH at 100 bar, 25 °C); and 99% for **2c'** (OJ-H; flow: 2.00 mL/min; 6.77 min (major), 7.18 min (minor); 100% CO<sub>2</sub> at 100 bar, 25 °C).

**2c'**: <sup>1</sup>H NMR (400 MHz, CDCl<sub>3</sub>) δ = 7.05 (t, *J* = 7.9 Hz, 1H), 6.72 (s, 1H), 6.70 (s, 1H), 5.61 (ddd, *J* = 17.1, 10.1, 8.9 Hz, 1H), 5.06 – 4.92 (m, 2H), 3.79 (s, 3H), 3.17 – 3.01 (m, 1H), 2.91 – 2.67 (m, 2H), 2.19 (tdd, *J* = 12.1, 9.2, 3.8 Hz, 1H), 1.85 – 1.58 (m, 4H), 1.46 – 1.11 (m, 7H); <sup>13</sup>C NMR (100 MHz, CDCl<sub>3</sub>) δ = 159.2, 144.5, 138.7, 135.9, 126.2, 122.5, 114.0, 109.3, 55.2, 49.4, 42.9, 38.7, 35.6, 34.4, 32.3, 22.1, 21.8, 17.7; IR (*v*<sub>max</sub>/cm<sup>-1</sup>): 3107, 3036, 2818, 1478, 1314, 1281, 1123, 681, 673, 630; MALDI-MS calcd for C<sub>18</sub>H<sub>24</sub>O (M<sup>+</sup>) 256.1822; found 256.1822; [α]<sub>D</sub><sup>25</sup> = +113.9 (*c* = 2.0, CHCl<sub>3</sub>).

**2c**: <sup>1</sup>H NMR (400 MHz, CDCl<sub>3</sub>) δ = 7.23 (d, *J* = 8.8 Hz, 1H), 6.73 (dd, *J* = 8.8, 2.8, 1H), 6.65 – 6.58 (m, 1H), 5.62 (ddd, *J* = 17.1, 10.1, 8.9 Hz, 1H), 5.07 – 4.97 (m, 2H), 3.79 (s, 3H), 2.88 – 2.81 (m, 2H), 2.30 – 2.22 (m, 1H), 2.15 – 2.03 (m, 1H), 1.93 – 1.84 (m, 1H), 1.79 – 1.68 (m, 3H), 1.56 – 1.17 (m, 4H), 1.13 (d, *J* = 0.6 Hz, 3H); <sup>13</sup>C NMR (100 MHz, CDCl<sub>3</sub>) δ = 157.3, 144.0, 140.7, 137.1, 125.9, 114.2, 113.7, 111.9, 55.3, 46.4, 43.5, 38.1, 36.6, 34.0, 30.0, 23.0, 22.5, 21.8; IR (*v*<sub>max</sub>/cm<sup>-1</sup>): 3109, 3036, 2816, 1478, 1321, 1277, 1165, 681, 673, 631; MALDI-MS calcd for C<sub>18</sub>H<sub>24</sub>O (M<sup>+</sup>) 256.1822; found 256.1822; [α]<sub>D</sub><sup>25</sup> = +132.3 (*c* = 2.0, CHCl<sub>3</sub>).

**(5a*S*,6*S*,9a*S*)-9a-methyl-3-(phenylsulfonyl)-6-vinyl-4,5,5a,6,7,8,9,9a-octahydro-3*H*-benzo[*e*]indole (2d)**

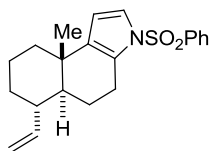

Following general procedure B by using (*E*)-7-methyl-10-(1-(phenylsulfonyl)-1*H*-pyrrol-2-yl)deca-1,7-dien-3-ol (**1d**) afforded the title compound as a colorless oil in 90 % yield. The enantiomeric ratio was found to be >99.5% (OJ-H; flow: 2.00

mL/min; 9.83 min (major), 10.98 min (minor); 98% CO<sub>2</sub>, 2% MeOH at 100 bar, 25 °C).

<sup>1</sup>H NMR (400 MHz, CDCl<sub>3</sub>) δ = 7.60 – 7.53 (m, 3H), 7.50 – 7.43 (m, 2H), 7.29 (d, *J* = 3.5 Hz, 1H), 6.05 (d, *J* = 3.5 Hz, 1H), 5.52 (ddd, *J* = 17.1, 10.1, 8.9 Hz, 1H), 5.01 – 4.87 (m, 2H), 2.74 – 2.61 (m, 1H), 2.47 – 2.41 (m, 2H), 2.15 – 2.02 (m, 1H), 1.80 – 1.71 (m, 1H), 1.66 – 1.52 (m, 2H), 1.45 – 1.13 (m, 6H), 1.13 – 0.93 (m, 1H), 0.79 – 0.61 (m, 1H); <sup>13</sup>C NMR (100 MHz, CDCl<sub>3</sub>) δ = 144.0, 141.4, 140.8, 133.2, 129.2, 126.1, 125.7, 125.2, 114.2, 112.0, 50.1, 42.3, 38.0, 36.0, 34.0, 24.9, 22.1, 21.1, 18.9; IR (*v*<sub>max</sub>/cm<sup>-1</sup>): 3727, 3626, 3090, 3035, 1812, 1478, 1363, 1173, 1034; ESI-MS calcd for C<sub>21</sub>H<sub>26</sub>NO<sub>2</sub>S (MH<sup>+</sup>) 356.1679; found 356.1685; [α]<sub>D</sub><sup>25</sup> = +69.9 (*c* = 2.0, CHCl<sub>3</sub>).

**(5a*S*,6*S*,9a*S*)-9a-methyl-1-(phenylsulfonyl)-6-vinyl-4,5,5a,6,7,8,9,9a-octahydro-1*H*-benzo[*g*]indole (2e)**

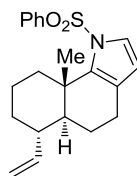

Following general procedure B by using (*E*)-7-methyl-10-(1-(phenylsulfonyl)-1*H*-pyrrol-3-yl)deca-1,7-dien-3-ol (**1e**) afforded the title compound as a colorless oil in 93 % yield. The enantiomeric ratio was found to be >99.5% (OJ-H; flow: 2.00 mL/min; 12.65 min (major), 13.27 min (minor); 98% CO<sub>2</sub>, 2% MeOH at 100 bar, 25 °C).

<sup>1</sup>H NMR (400 MHz, CDCl<sub>3</sub>) δ = 7.79 – 7.72 (m, 2H), 7.59 (ddt, *J* = 8.3, 6.7, 1.3 Hz, 1H), 7.53 – 7.47 (m, 2H), 7.16 (dt, *J* = 3.4, 0.9 Hz, 1H), 6.13 (d, *J* = 3.4 Hz, 1H), 5.52 (ddd, *J* = 17.0, 10.2, 8.9 Hz, 1H), 4.99 – 4.92 (m, 2H), 2.87 – 2.76 (m, 1H), 2.47 (dddd, *J* = 17.2, 11.4, 7.1, 1.2 Hz, 1H), 2.00 (tdd, *J* = 12.0, 8.8, 3.8 Hz, 1H), 1.93 – 1.49 (m, 5H), 1.47 – 1.07 (m, 4H), 1.05 – 0.97 (s, 3H); <sup>13</sup>C NMR (100 MHz, CDCl<sub>3</sub>) δ = 143.7, 139.7, 135.5, 133.6, 129.4, 127.7, 126.9, 121.2, 114.31, 109.0, 46.9, 42.2, 37.6, 34.2, 34.2, 23.7, 22.2, 21.7, 21.1; IR (*v*<sub>max</sub>/cm<sup>-1</sup>): 3725,

3625, 2928, 2848, 1478, 1369, 1184, 1135; ESI-MS calcd for  $C_{21}H_{26}NO_2S$  ( $MH^+$ ) 356.1679; found 356.1684;  $[\alpha]_D^{25} = +92.6$  ( $c = 2.0$ ,  $CHCl_3$ ).

**(4*S*,4*aS*,11*bS*)-*tert*-butyl 11*b*-methyl-4-vinyl-2,3,4,4*a*,5,6-hexahydro-1*H*-benzo[*a*]carbazole-11(11*bH*)-carboxylate (2f)**

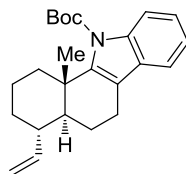

Following general procedure B by using (*E*)-*tert*-butyl 3-(8-hydroxy-4-methyldeca-3,9-dien-1-yl)-1*H*-indole-1-carboxylate (**1f**) afforded the title compound as a colorless oil in 86 % yield. The enantiomeric ratio was found to be >99.5% (OJ-H; flow: 2.00 mL/min; 7.71 min (major), 8.24 min (minor); 99.5%  $CO_2$ , 0.5% MeOH at 100 bar, 25 °C).

$^1H$  NMR (400 MHz,  $CDCl_3$ )  $\delta$  = 7.87 (ddd,  $J = 8.3, 1.2, 0.7$  Hz, 1H), 7.38 (ddd,  $J = 7.3, 1.6, 0.7$  Hz, 1H), 7.26 – 7.14 (m, 2H), 5.61 (ddd,  $J = 17.1, 10.1, 8.9$  Hz, 1H), 5.07 – 4.97 (m, 2H), 2.76 – 2.54 (m, 3H), 2.29 – 2.16 (m, 1H), 1.94 (ddt,  $J = 15.1, 6.8, 1.6$  Hz, 1H), 1.80 – 1.50 (m, 15H), 1.47 – 1.12 (m, 4H);  $^{13}C$  NMR (100 MHz,  $CDCl_3$ )  $\delta$  = 151.6, 145.1, 144.1, 136.9, 129.4, 123.6, 122.1, 118.0, 116.8, 114.6, 114.2, 83.6, 50.9, 42.6, 37.7, 34.3, 34.2, 28.4, 22.1, 21.6, 21.1, 18.3; IR ( $\nu_{max}/cm^{-1}$ ): 3069, 2976, 2927, 2862, 1731, 1478, 1454, 1368, 1356, 1310, 1250, 1223, 1153, 1117; ESI-MS calcd for  $C_{24}H_{31}NNaO_2$  ( $MNa^+$ ) 388.2247; found 388.2244;  $[\alpha]_D^{25} = +182.6$  ( $c = 2.0$ ,  $CHCl_3$ ).

**(4*S*,4a*S*,12b*S*)-12b-methyl-4-vinyl-1,2,3,4,4a,5,6,12b-octahydroindolo[2,1-*a*]isoquinoline (2g)**

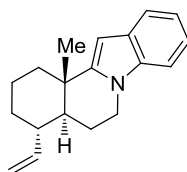

Following general procedure B by using (*E*)-10-(1*H*-indol-1-yl)-7-methyldeca-1,7-dien-3-ol (**1g**) afforded the title compound as a white foam in 71 % yield. The enantiomeric excess was found to be 99% (IB; flow: 2.00 mL/min; 8.03 min (minor), 9.03 min (major); 95% CO<sub>2</sub>, 5% MeOH at 100 bar, 25 °C).

<sup>1</sup>H NMR (400 MHz, CDCl<sub>3</sub>)  $\delta$  = 7.54 (dt, *J* = 7.6, 0.9 Hz, 1H), 7.27 – 7.23 (m, 1H), 7.14 (ddd, *J* = 8.2, 7.0, 1.3 Hz, 1H), 7.08 (ddd, *J* = 8.2, 7.1, 1.2 Hz, 1H), 6.21 (s, 1H), 5.61 (ddd, *J* = 17.0, 10.1, 8.8 Hz, 1H), 5.12 – 4.99 (m, 2H), 4.30 (ddd, *J* = 11.9, 7.0, 1.3 Hz, 1H), 3.83 (td, *J* = 11.9, 6.5 Hz, 1H), 2.24 – 2.05 (m, 4H), 1.96 – 1.62 (m, 5H), 1.53 – 1.45 (m, 1H), 1.28 (s, 3H); <sup>13</sup>C NMR (100 MHz, CDCl<sub>3</sub>)  $\delta$  = 149.2, 143.0, 136.3, 128.6, 120.4, 120.0, 119.7, 115.1, 108.9, 94.3, 44.4, 42.6, 42.4, 37.6, 35.2, 33.7, 22.7, 22.4, 21.0; IR ( $\nu_{max}$ /cm<sup>-1</sup>): 3090, 3035, 2912, 2818, 1478, 1321, 1124, 681, 673, 630; MALDI-MS calcd for C<sub>19</sub>H<sub>23</sub>N (M<sup>+</sup>) 265.1825; found 265.1825;  $[\alpha]_D^{25}$  = +100.4 (c = 2.0, CHCl<sub>3</sub>).

**(4*S*,4a*S*,11c*S*)-11c-methyl-4-vinyl-1,2,3,4,4a,5,6,11c-octahydronaphtho[2,1-*b*]benzofuran (2h)**

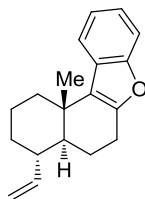

Following general procedure B by using (*E*)-10-(benzofuran-2-yl)-7-methyldeca-1,7-dien-3-ol (**1h**) afforded the title compound as a colorless oil in 89 % yield. The enantiomeric ratio was found to be 99.5% (IB; flow: 2.00 mL/min; 6.86 min (minor), 7.43 min (major); 98% CO<sub>2</sub>, 2% MeOH at 100 bar, 25 °C).

<sup>1</sup>H NMR (400 MHz, CDCl<sub>3</sub>)  $\delta$  = 7.61 – 7.54 (m, 1H), 7.45 – 7.35 (m, 1H), 7.22 – 7.09 (m, 2H), 5.62 (ddd, *J* = 17.1, 10.1, 8.9 Hz, 1H), 5.07 – 4.99 (m, 2H), 2.77 –

2.70 (m, 2H), 2.54 – 2.46 (m, 1H), 2.23 – 2.10 (m, 1H), 2.04 – 1.95 (m, 1H), 1.83 – 1.63 (m, 3H), 1.62 – 1.50 (m, 2H), 1.43 (ddd,  $J = 13.0, 11.1, 2.2$  Hz, 1H), 1.27 (s, 4H);  $^{13}\text{C}$  NMR (101 MHz,  $\text{CDCl}_3$ )  $\delta = 154.9, 153.0, 143.7, 127.5, 123.1, 122.6, 122.0, 120.2, 114.4, 111.1, 48.4, 42.2, 37.1, 35.5, 34.3, 24.3, 22.2, 21.1, 20.0$ ; IR ( $\nu_{\text{max}}/\text{cm}^{-1}$ ): 3071, 3035, 2929, 1478, 1451, 1182, 674, 630; ESI-MS calcd for  $\text{C}_{19}\text{H}_{23}\text{O}$  ( $\text{MH}^+$ ) 267.1743; found 267.1746;  $[\alpha]_{\text{D}}^{25} = +98.6$  ( $c = 5.0, \text{CHCl}_3$ ).

**(1*S*,4*aS*,4*bR*,10*bR*,12*aS*)-8,10-dimethoxy-4*a*,10*b*-dimethyl-1-vinyl-1,2,3,4,4*a*,4*b*,5,6,10*b*,11,12,12*a*-dodecahydrochrysene (2i)**

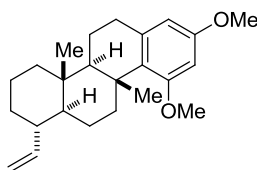

Following general procedure B by using (7*E*,11*E*)-14-(3,5-dimethoxyphenyl)-7,11-dimethyltetradeca-1,7,11-trien-3-ol (**1i**) afforded the title compound as a white solid in 43 % yield and a mixture of mono- and dicyclized product **2i'** in 30 % yield. The enantiomeric excess was found to be 99.5% (OJ-H; flow: 2.00 mL/min; 16.49 min (major), 18.19 min (minor); 99.5%  $\text{CO}_2$ , 0.5% MeOH at 100 bar, 25 °C).

$^1\text{H}$  NMR (400 MHz,  $\text{CDCl}_3$ )  $\delta = 6.28$  (d,  $J = 2.6$  Hz, 1H), 6.20 (d,  $J = 2.4$  Hz, 1H), 5.54 (ddd,  $J = 17.1, 10.1, 8.9$  Hz, 1H), 4.98 – 4.84 (m, 2H), 3.76 (s, 3H), 3.74 (s, 3H), 3.10 (dt,  $J = 12.9, 2.8$  Hz, 1H), 2.87 – 2.75 (m, 2H), 1.96 – 1.78 (m, 3H), 1.73 – 1.47 (m, 5H), 1.35 – 1.07 (m, 7H), 1.00 – 0.80 (m, 5H);  $^{13}\text{C}$  NMR (100 MHz,  $\text{CDCl}_3$ )  $\delta = 159.8, 157.9, 144.5, 138.9, 130.8, 113.4, 104.9, 97.8, 56.3, 55.2, 55.2, 51.8, 42.6, 39.8, 39.1, 37.8, 37.5, 34.1, 33.8, 23.2, 21.2, 21.0, 18.1, 14.4$ ; IR ( $\nu_{\text{max}}/\text{cm}^{-1}$ ): 3079, 2986, 2964, 2929, 2841, 1615, 1575, 1473, 1463, 1449, 1291, 1220, 1159, 1097; MALDI-MS calcd for  $\text{C}_{24}\text{H}_{35}\text{O}_2$  ( $\text{MH}^+$ ) 355.2632; found 355.2632; m.p. [°C] = 154.5 – 155.5;  $[\alpha]_{\text{D}}^{25} = -31.6$  ( $c = 1.0, \text{CHCl}_3$ ).

**Procedure for cyclization of 2i' to 2i**

To a solution of **2i'** (35 mg, 1.0 mmol, 1.0 equiv) in DCE (4 mL) was added TFA (38  $\mu\text{L}$ , 0.50 mmol, 5.0 equiv) and the reaction mixture was stirred for 24h at 60 °C. The solvent was removed under reduced pressure and the residue was

purified by flash chromatography ( $\text{SiO}_2$ ; Hexanes/ $\text{CH}_2\text{Cl}_2$  5:1) to give the product **2i** as a white solid in 75 % yield and 99.5% ee.

## Determination of Absolute Stereochemistry

**Determination of the absolute stereochemistry of (1*S*,4*aS*,10*aS*)-5-methoxy-4*a*-methyl-1-vinyl-1,2,3,4,4*a*,9,10,10*a*-octahydrophenanthrene by correlation of 2*c'* to (1*R*,4*aS*,10*aS*)-5-methoxy-4*a*-methyl-1,2,3,4,4*a*,9,10,10*a*-octahydrophenanthrene-1-carbaldehyde**

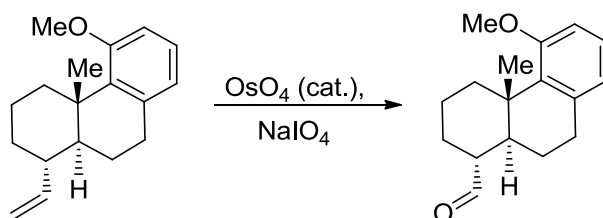

Sodium metaperiodate (25.0 mg, 0.12 mmol, 3.0 equiv) and osmium(VIII) oxide (4.0 % solution in water, 6.0  $\mu$ L, 0.8  $\mu$ mol, 0.02 equiv) were added at 0  $^{\circ}$ C to a solution of (1*S*,4*aS*,10*aS*)-5-methoxy-4*a*-methyl-1-vinyl-1,2,3,4,4*a*,9,10,10*a*-octahydrophenanthrene (175 mg, 0.80 mmol, 1.0 equiv) in acetone/water 3:1 (0.5 mL). After 1 h, the reaction mixture was allowed to reach room temperature, and was then partitioned between ethyl acetate and water. The organic layer was washed with brine, dried ( $\text{MgSO}_4$ ), and evaporated under reduced pressure. The residue was purified by flash chromatography ( $\text{SiO}_2$ , hexanes/EtOAc 5:1) to provide (1*R*,4*aS*,10*aS*)-5-methoxy-4*a*-methyl-1,2,3,4,4*a*,9,10,10*a*-octahydrophenanthrene-1-carbaldehyde.  $[\alpha]_{\text{D}}^{28} = +106.5$  ( $c = 0.5$ ,  $\text{CHCl}_3$ ); reported<sup>9</sup> rotation for (1*S*,4*aR*,10*aR*)-5-methoxy-4*a*-methyl-1,2,3,4,4*a*,9,10,10*a*-octahydrophenanthrene-1-carbaldehyde  $[\alpha]_{\text{D}}^{20} = -70.8$  ( $c = 0.53$ ,  $\text{CHCl}_3$ , 88% ee).

<sup>9</sup> Rendler, S.; MacMillan, D. W. C. *J. Am. Chem. Soc.* **2010**, 132, 5027-5029.

## X-ray Structure of **2i**

Single crystals of **2i** suitable for X-ray crystallographic analysis were obtained by a single recrystallization at room temperature using slow diffusion of MeOH into a solution of **2i** in CH<sub>2</sub>Cl<sub>2</sub>. X-ray crystal structure analysis of **2i**: formula C<sub>24</sub>H<sub>34</sub>O<sub>2</sub>,  $M = 354.51$ , colorless crystals 0.090 x 0.260 x 0.320 mm, monoclinic, space group C121,  $a = 13.0071(7)$  Å,  $b = 6.7819(4)$  Å,  $c = 22.0380(15)$  Å,  $\beta = 93.132(2)^\circ$ ,  $V = 1941.1(2)$  Å<sup>3</sup>,  $d_{\text{calc.}} = 1.213$  g·cm<sup>-3</sup>,  $I = 0.075$  mm<sup>-1</sup>. See provided cif-file for further details.

Figure S1. X-ray structure of **2i**

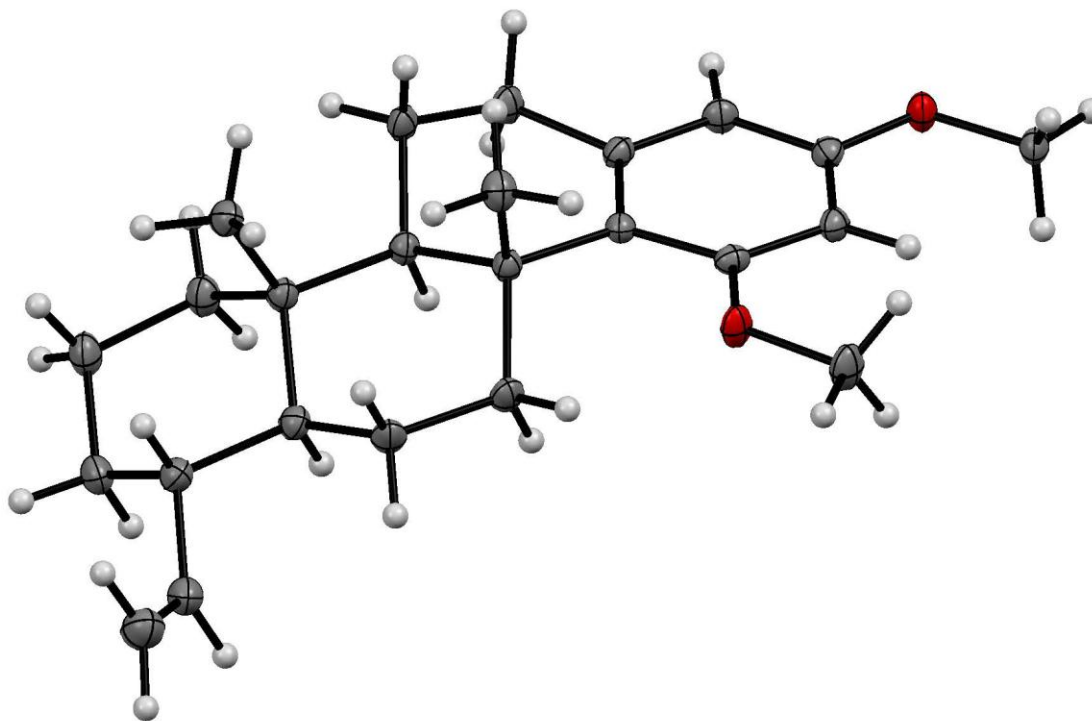



## SFC traces of racemic and enantioenriched products

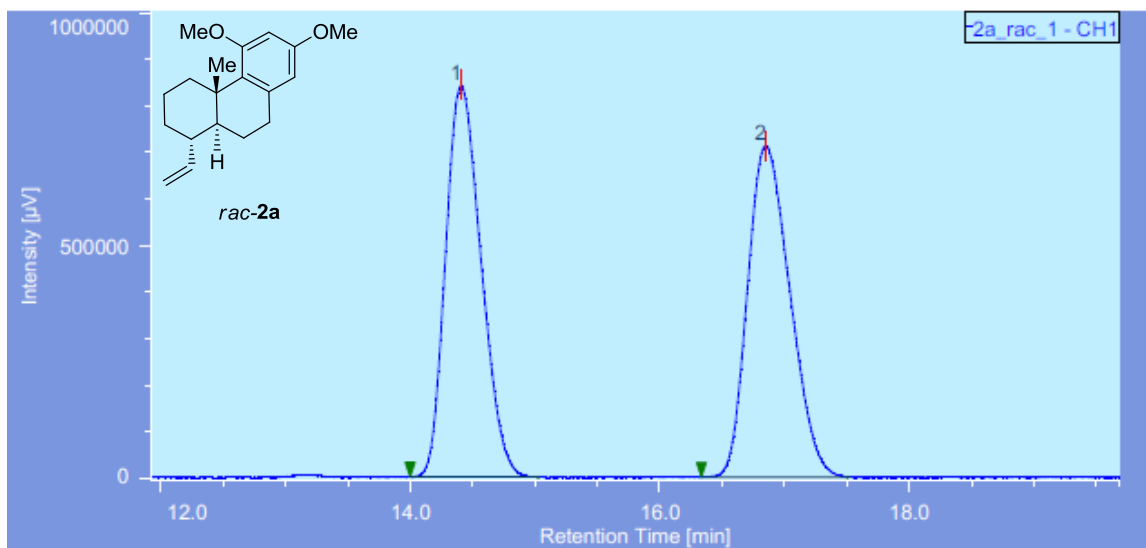

| # | Peak Name | CH | tR [min] | Area [ $\mu\text{V}\cdot\text{sec}$ ] | Height [ $\mu\text{V}$ ] | Area%  | Height% | Quantity | NTP   | Resolution | Symmetry Factor | Warning |
|---|-----------|----|----------|---------------------------------------|--------------------------|--------|---------|----------|-------|------------|-----------------|---------|
| 1 | Unknown   | 1  | 14.408   | 16642962                              | 840238                   | 49.891 | 54.159  | N/A      | 11739 | 4.190      | 1.229           |         |
| 2 | Unknown   | 1  | 16.850   | 16715579                              | 711198                   | 50.109 | 45.841  | N/A      | 11209 | N/A        | 1.244           |         |

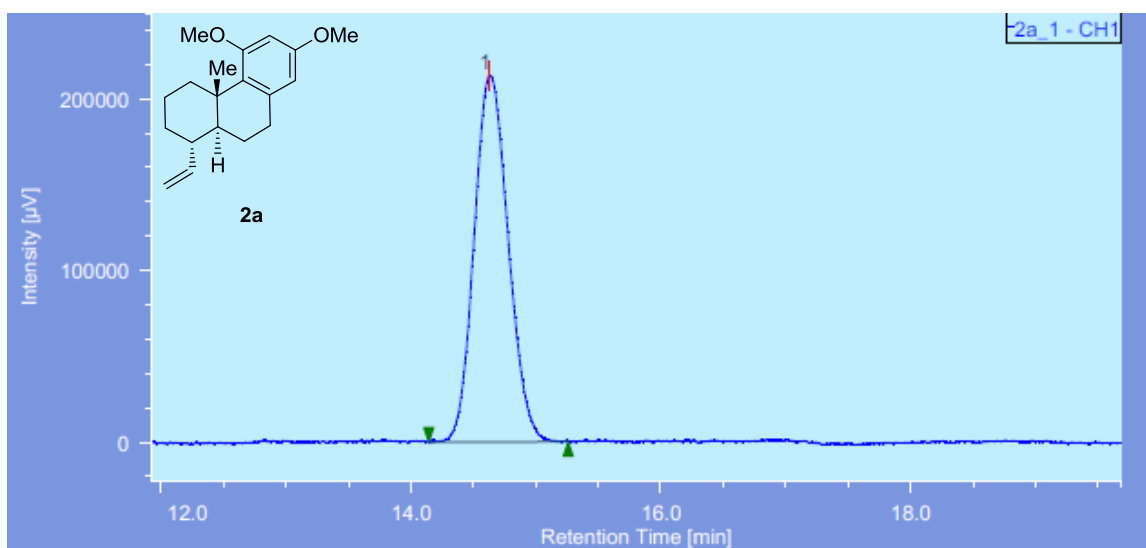

| # | Peak Name | CH | tR [min] | Area [ $\mu\text{V}\cdot\text{sec}$ ] | Height [ $\mu\text{V}$ ] | Area%   | Height% | Quantity | NTP   | Resolution | Symmetry Factor | Warning |
|---|-----------|----|----------|---------------------------------------|--------------------------|---------|---------|----------|-------|------------|-----------------|---------|
| 1 | Unknown   | 1  | 14.633   | 4050259                               | 213222                   | 100.000 | 100.000 | N/A      | 13532 | N/A        | 1.126           |         |

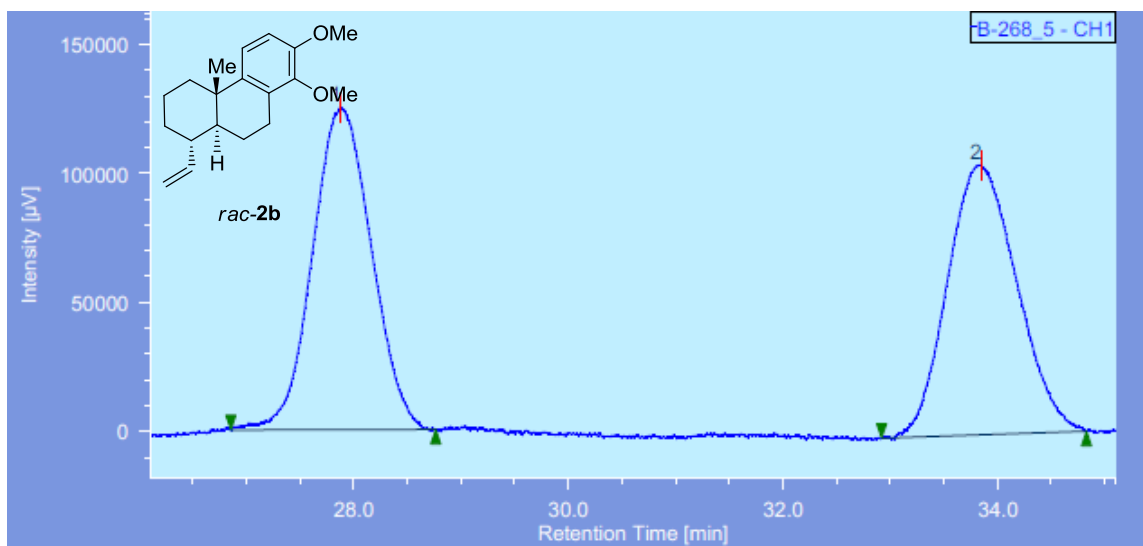

| # | Peak Name | CH | tR [min] | Area [μV·sec] | Height [μV] | Area%  | Height% | Quantity | NTP   | Resolution | Symmetry Factor | Warning |
|---|-----------|----|----------|---------------|-------------|--------|---------|----------|-------|------------|-----------------|---------|
| 1 | Unknown   | 1  | 27.883   | 4764766       | 124768      | 50.462 | 54.396  | N/A      | 12027 | 5.369      | 1.039           |         |
| 2 | Unknown   | 1  | 33.842   | 4677576       | 104603      | 49.538 | 45.604  | N/A      | 12546 | N/A        | 1.115           |         |

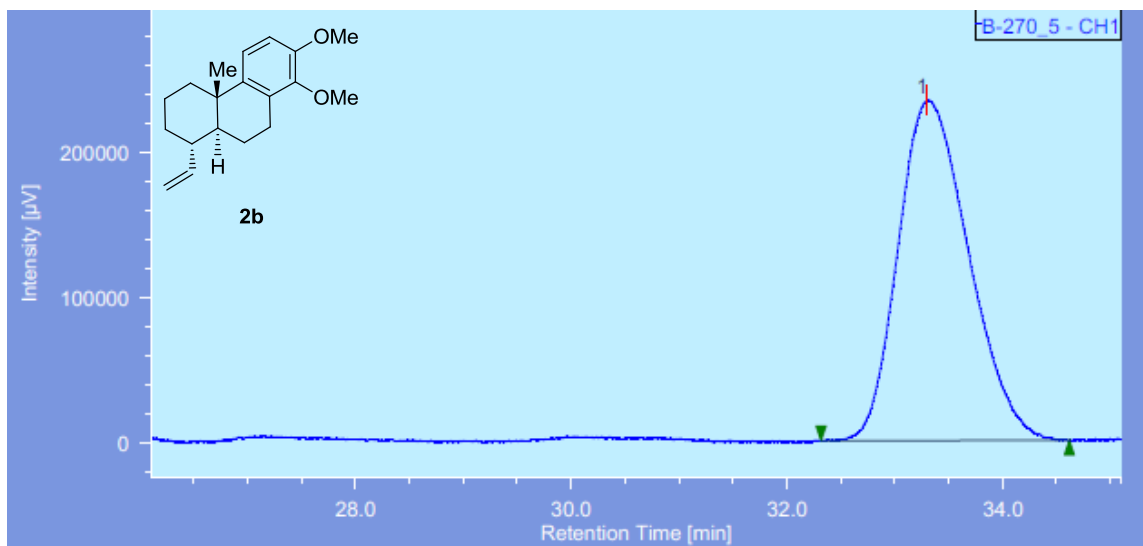

| # | Peak Name | CH | tR [min] | Area [μV·sec] | Height [μV] | Area%   | Height% | Quantity | NTP   | Resolution | Symmetry Factor | Warning |
|---|-----------|----|----------|---------------|-------------|---------|---------|----------|-------|------------|-----------------|---------|
| 1 | Unknown   | 1  | 33.300   | 10675693      | 234819      | 100.000 | 100.000 | N/A      | 12053 | N/A        | 1.261           |         |

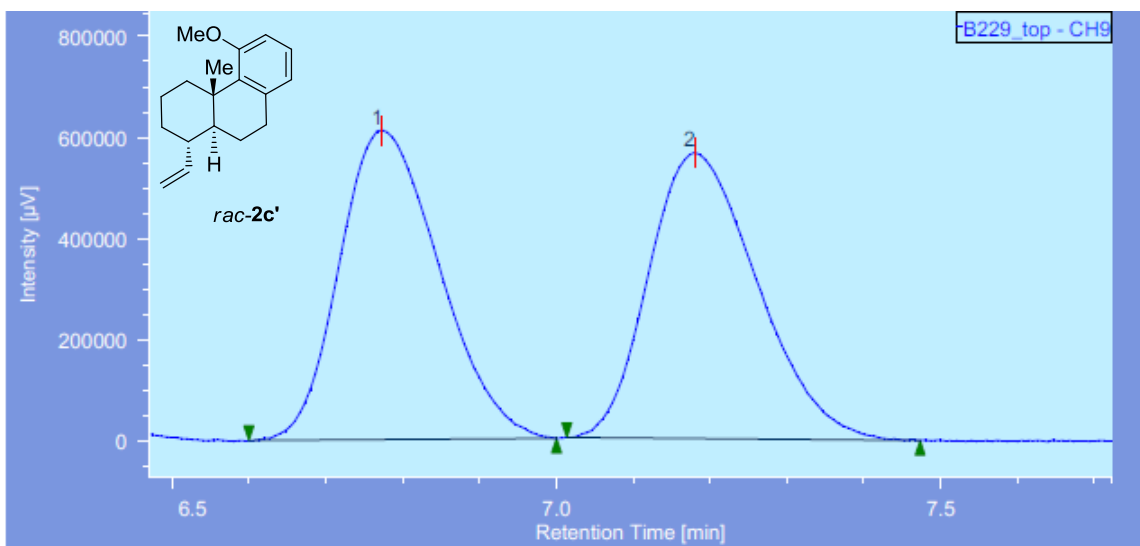

| # | Peak Name | CH | tR [min] | Area [ $\mu\text{V}\cdot\text{sec}$ ] | Height [ $\mu\text{V}$ ] | Area%  | Height% | Quantity | NTP   | Resolution | Symmetry Factor | Warning |
|---|-----------|----|----------|---------------------------------------|--------------------------|--------|---------|----------|-------|------------|-----------------|---------|
| 1 | Unknown   | 9  | 6.773    | 5501396                               | 610832                   | 49.907 | 51.963  | N/A      | 12547 | 1.617      | 1.230           |         |
| 2 | Unknown   | 9  | 7.180    | 5521952                               | 564683                   | 50.093 | 48.037  | N/A      | 11961 | N/A        | 1.265           |         |

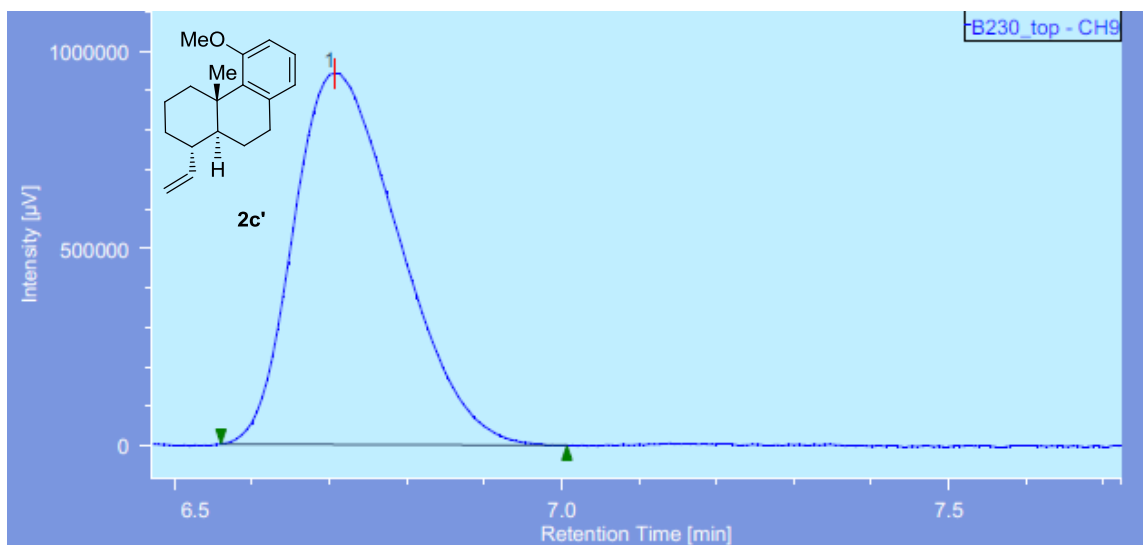

| # | Peak Name | CH | tR [min] | Area [ $\mu\text{V}\cdot\text{sec}$ ] | Height [ $\mu\text{V}$ ] | Area%   | Height% | Quantity | NTP   | Resolution | Symmetry Factor | Warning |
|---|-----------|----|----------|---------------------------------------|--------------------------|---------|---------|----------|-------|------------|-----------------|---------|
| 1 | Unknown   | 9  | 6.707    | 8929391                               | 940351                   | 100.000 | 100.000 | N/A      | 10961 | N/A        | 1.385           |         |

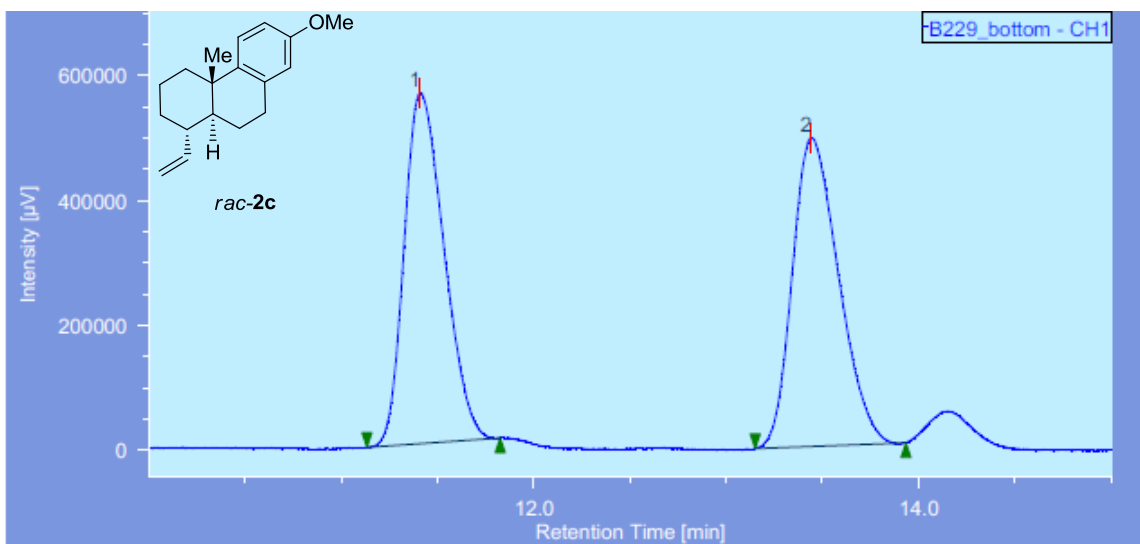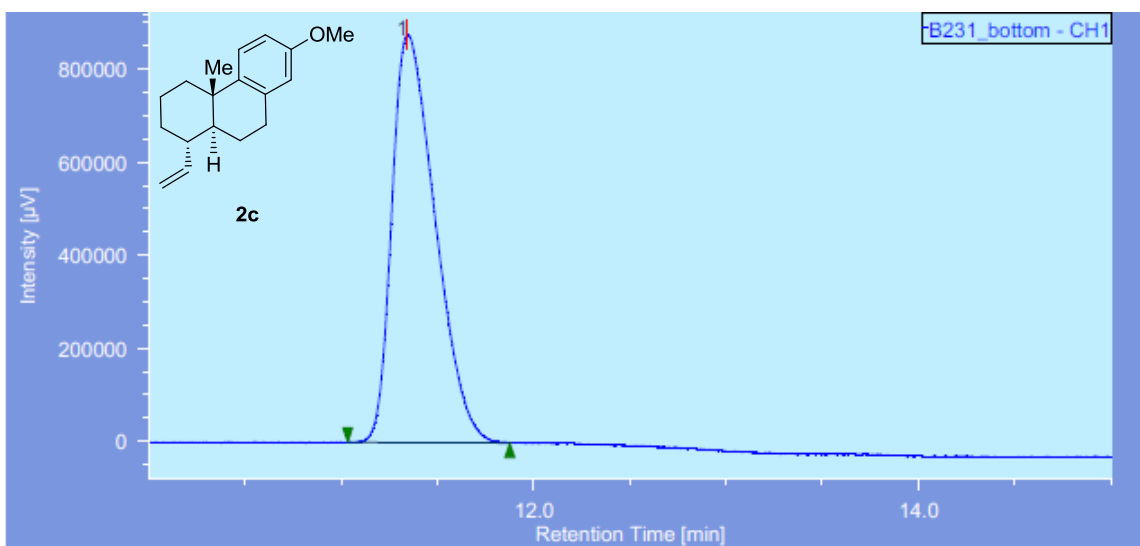

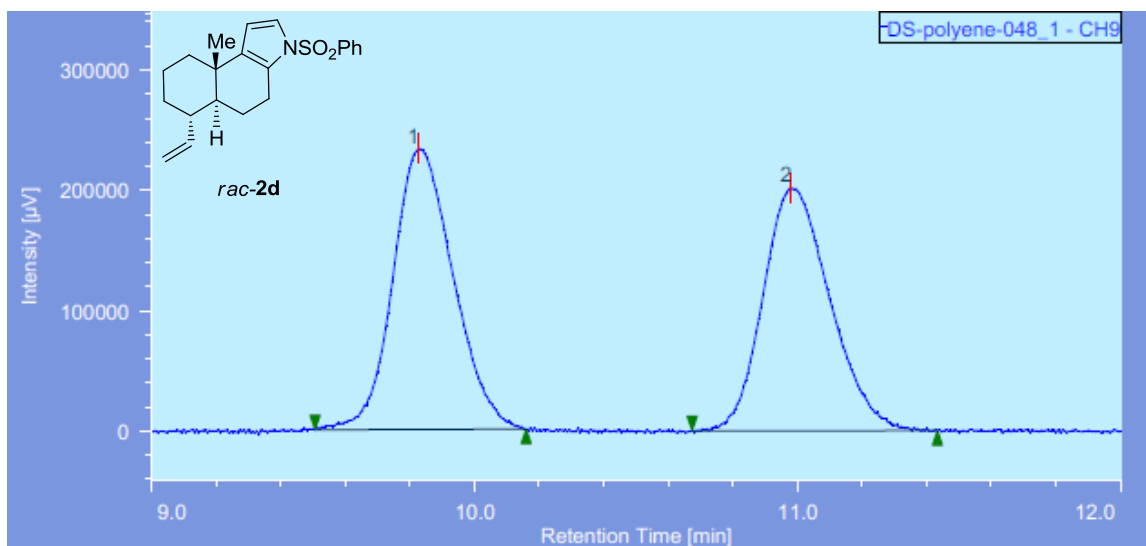

| # | Peak Name | CH | tR [min] | Area [ $\mu\text{V}\cdot\text{sec}$ ] | Height [ $\mu\text{V}$ ] | Area%  | Height% | Quantity | NTP   | Resolution | Symmetry Factor | Warning |
|---|-----------|----|----------|---------------------------------------|--------------------------|--------|---------|----------|-------|------------|-----------------|---------|
| 1 | Unknown   | 9  | 9.827    | 3030887                               | 232991                   | 51.064 | 53.635  | N/A      | 13388 | 3.212      | 1.177           |         |
| 2 | Unknown   | 9  | 10.980   | 2904594                               | 201413                   | 48.936 | 46.365  | N/A      | 13341 | N/A        | 1.251           |         |

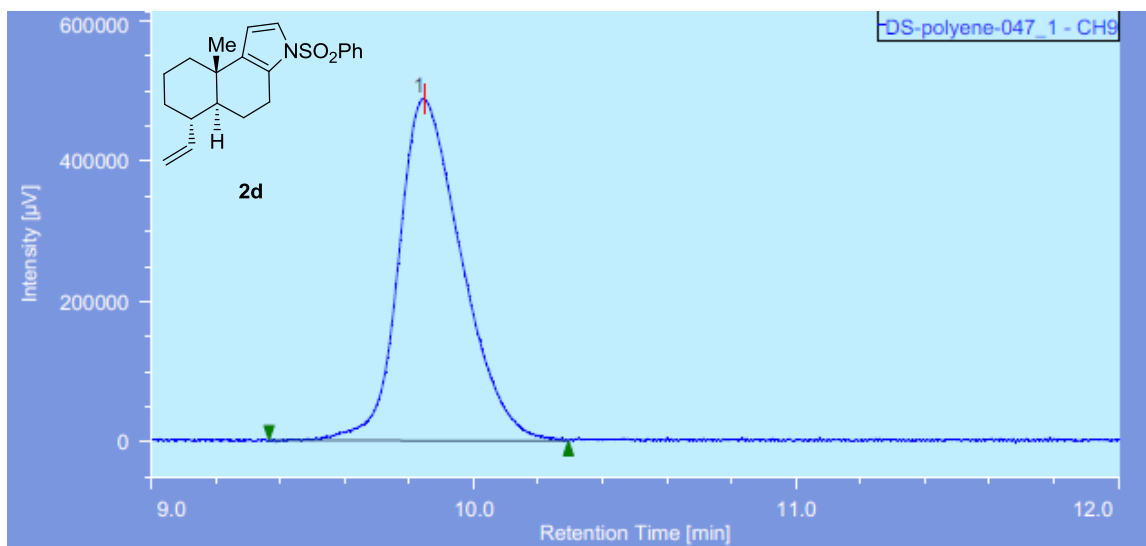

| # | Peak Name | CH | tR [min] | Area [ $\mu\text{V}\cdot\text{sec}$ ] | Height [ $\mu\text{V}$ ] | Area%   | Height% | Quantity | NTP   | Resolution | Symmetry Factor | Warning |
|---|-----------|----|----------|---------------------------------------|--------------------------|---------|---------|----------|-------|------------|-----------------|---------|
| 1 | Unknown   | 9  | 9.847    | 6610054                               | 486880                   | 100.000 | 100.000 | N/A      | 12762 | N/A        | 1.279           |         |

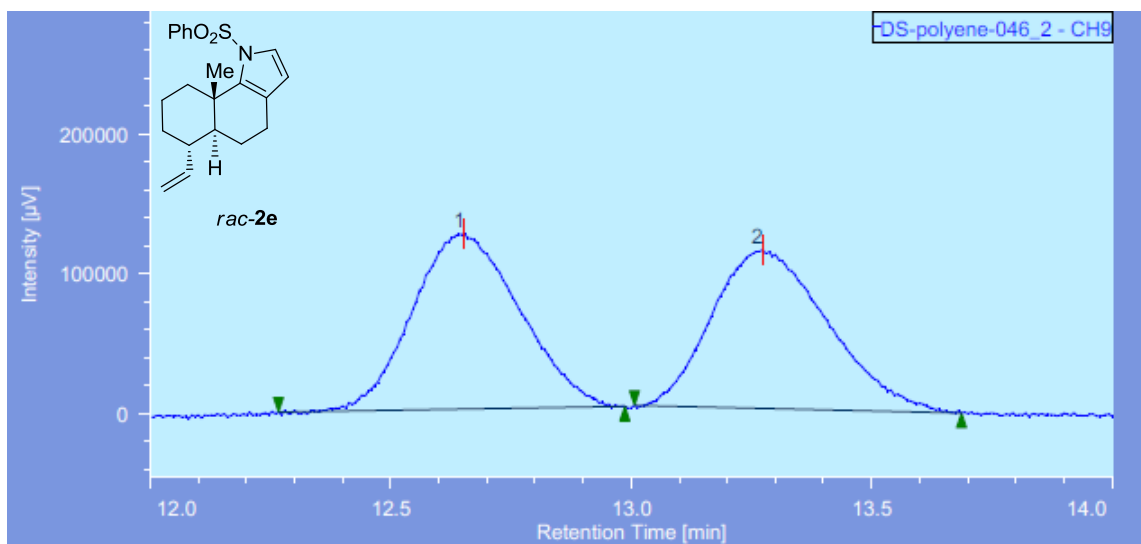

| # | Peak Name | CH | tR [min] | Area [μV·sec] | Height [μV] | Area%  | Height% | Quantity | NTP   | Resolution | Symmetry Factor | Warning |
|---|-----------|----|----------|---------------|-------------|--------|---------|----------|-------|------------|-----------------|---------|
| 1 | Unknown   | 9  | 12.653   | 1944327       | 125740      | 50.683 | 52.549  | N/A      | 14318 | 1.423      | 1.089           |         |
| 2 | Unknown   | 9  | 13.273   | 1891909       | 113542      | 49.317 | 47.451  | N/A      | 13881 | N/A        | 1.267           |         |

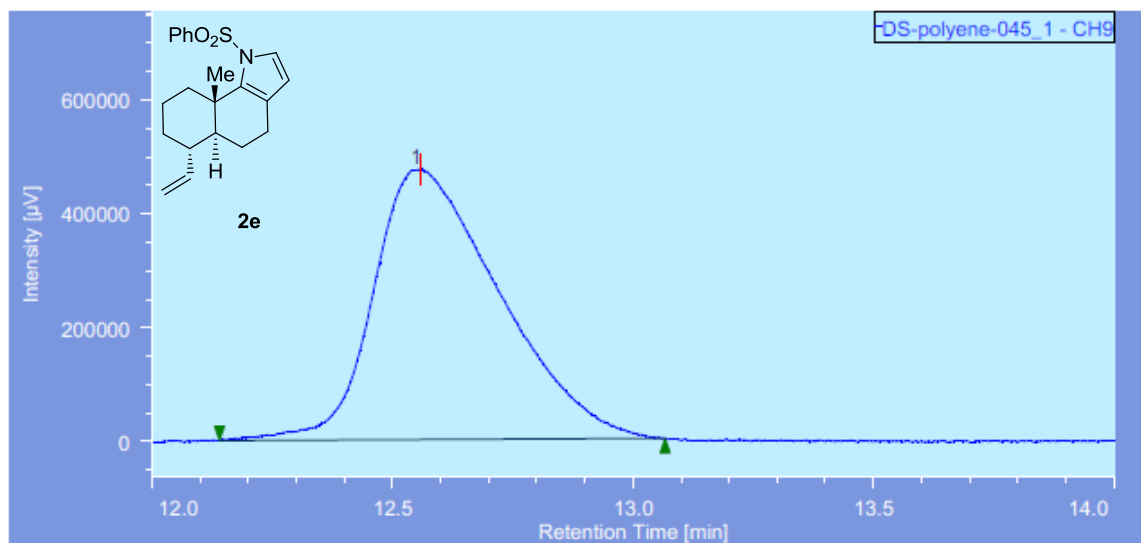

| # | Peak Name | CH | tR [min] | Area [μV·sec] | Height [μV] | Area%   | Height% | Quantity | NTP   | Resolution | Symmetry Factor | Warning |
|---|-----------|----|----------|---------------|-------------|---------|---------|----------|-------|------------|-----------------|---------|
| 1 | Unknown   | 9  | 12.560   | 8644688       | 473939      | 100.000 | 100.000 | N/A      | 11037 | N/A        | 1.397           |         |

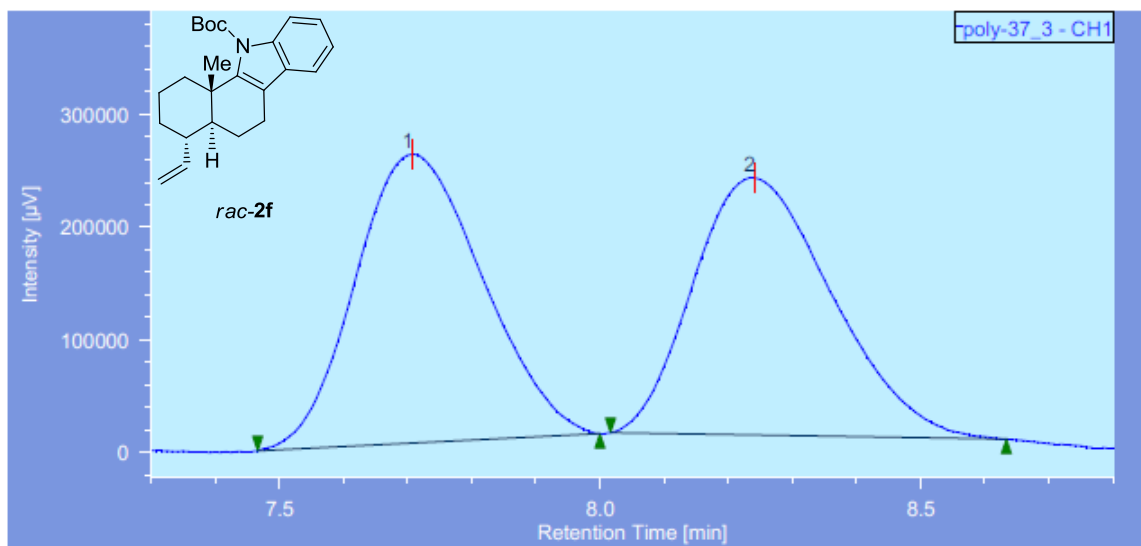

| # | Peak Name | CH | tR [min] | Area [ $\mu\text{V}\cdot\text{sec}$ ] | Height [ $\mu\text{V}$ ] | Area%  | Height% | Quantity | NTP  | Resolution | Symmetry Factor | Warning |
|---|-----------|----|----------|---------------------------------------|--------------------------|--------|---------|----------|------|------------|-----------------|---------|
| 1 | Unknown   | 1  | 7.708    | 3517761                               | 256159                   | 50.712 | 52.925  | N/A      | 6882 | 1.378      | 1.142           |         |
| 2 | Unknown   | 1  | 8.242    | 3418938                               | 227844                   | 49.288 | 47.075  | N/A      | 6632 | N/A        | 1.240           |         |

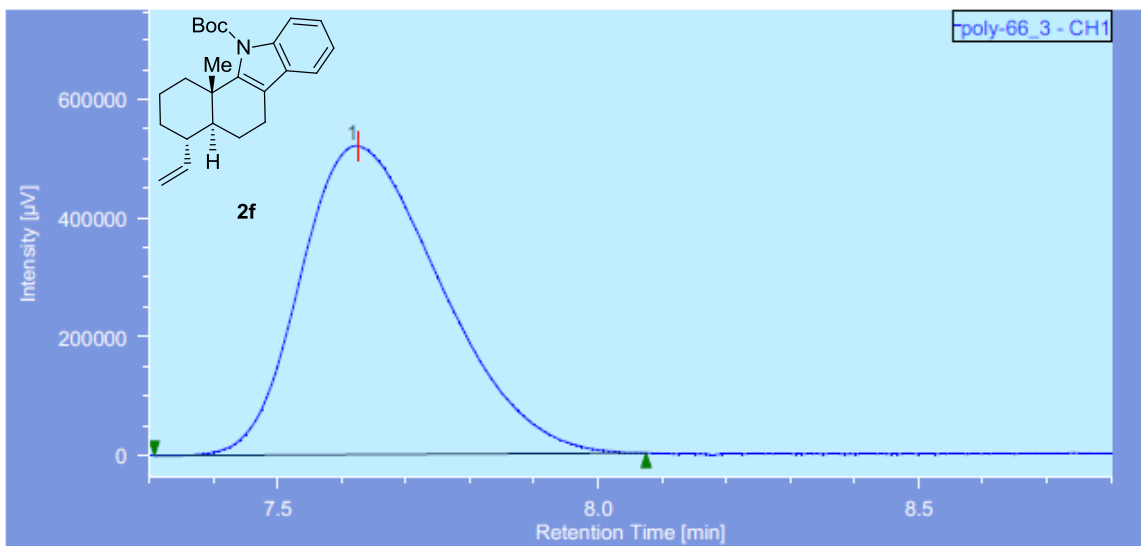

| # | Peak Name | CH | tR [min] | Area [ $\mu\text{V}\cdot\text{sec}$ ] | Height [ $\mu\text{V}$ ] | Area%   | Height% | Quantity | NTP  | Resolution | Symmetry Factor | Warning |
|---|-----------|----|----------|---------------------------------------|--------------------------|---------|---------|----------|------|------------|-----------------|---------|
| 1 | Unknown   | 1  | 7.625    | 7905706                               | 520098                   | 100.000 | 100.000 | N/A      | 5649 | N/A        | 1.349           |         |

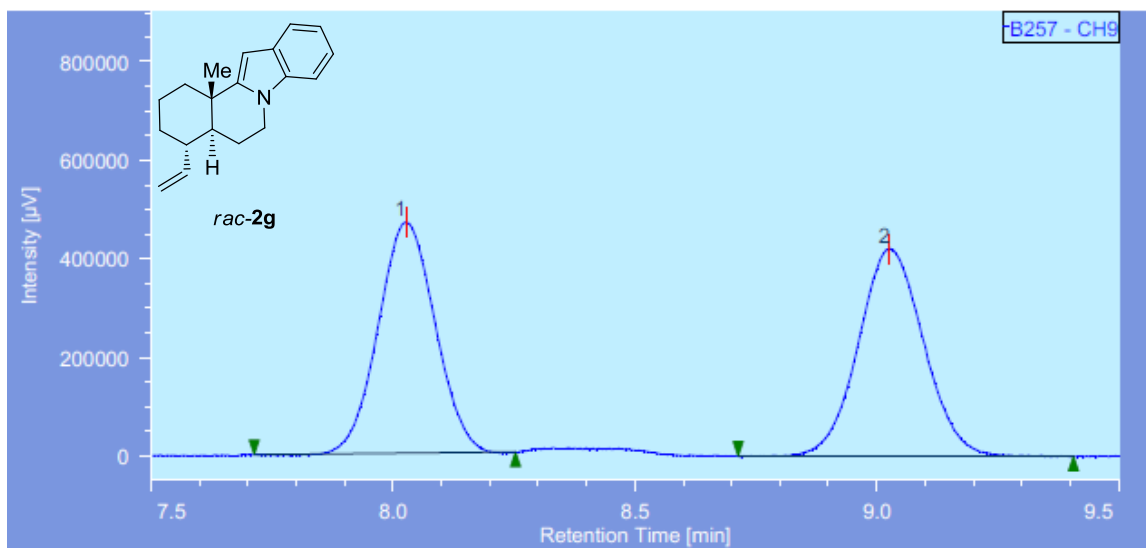

| # | Peak Name | CH | tR [min] | Area [ $\mu\text{V}\cdot\text{sec}$ ] | Height [ $\mu\text{V}$ ] | Area%  | Height% | Quantity | NTP   | Resolution | Symmetry Factor | Warning |
|---|-----------|----|----------|---------------------------------------|--------------------------|--------|---------|----------|-------|------------|-----------------|---------|
| 1 | Unknown   | 9  | 8.027    | 3812775                               | 468410                   | 49.181 | 52.679  | N/A      | 22002 | 4.333      | 1.032           |         |
| 2 | Unknown   | 9  | 9.027    | 3939820                               | 420760                   | 50.819 | 47.321  | N/A      | 21487 | N/A        | 1.049           |         |

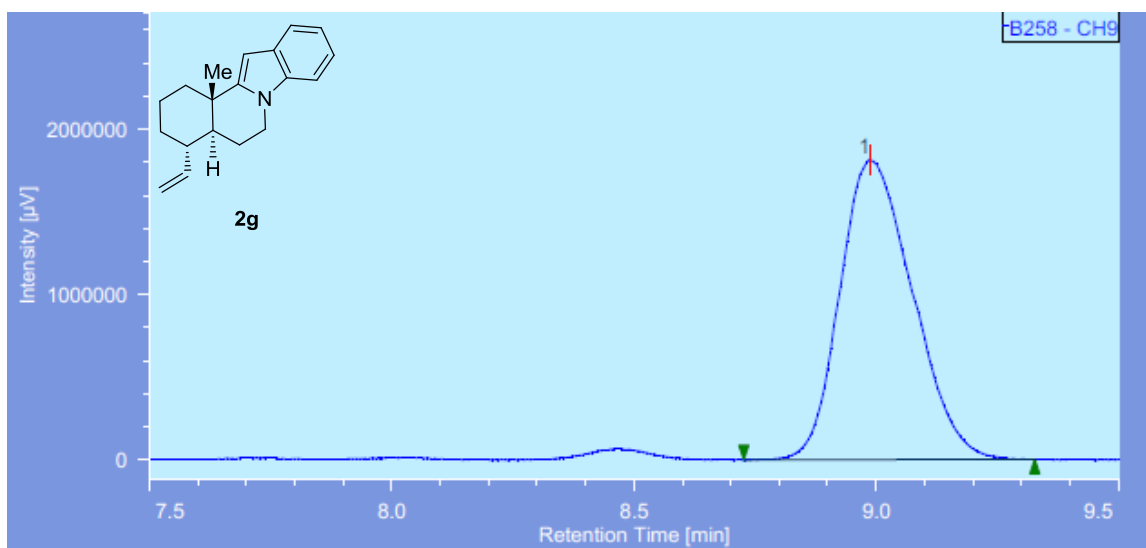

| # | Peak Name | CH | tR [min] | Area [ $\mu\text{V}\cdot\text{sec}$ ] | Height [ $\mu\text{V}$ ] | Area%   | Height% | Quantity | NTP   | Resolution | Symmetry Factor | Warning |
|---|-----------|----|----------|---------------------------------------|--------------------------|---------|---------|----------|-------|------------|-----------------|---------|
| 1 | Unknown   | 9  | 8.987    | 18880257                              | 1815618                  | 100.000 | 100.000 | N/A      | 16191 | N/A        | 1.252           |         |



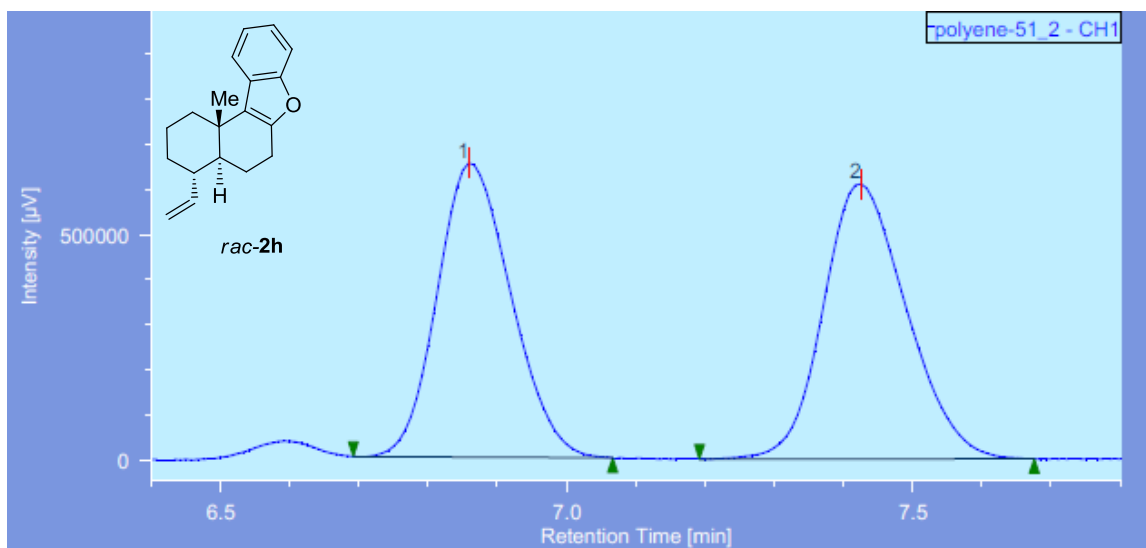

| # | Peak Name | CH | tR [min] | Area [ $\mu\text{V}\cdot\text{sec}$ ] | Height [ $\mu\text{V}$ ] | Area%  | Height% | Quantity | NTP   | Resolution | Symmetry Factor | Warning |
|---|-----------|----|----------|---------------------------------------|--------------------------|--------|---------|----------|-------|------------|-----------------|---------|
| 1 | Unknown   | 1  | 6.858    | 4812327                               | 650068                   | 48.552 | 51.633  | N/A      | 19431 | 2.728      | 1.183           |         |
| 2 | Unknown   | 1  | 7.425    | 5099302                               | 608937                   | 51.448 | 48.367  | N/A      | 18253 | N/A        | 1.154           |         |

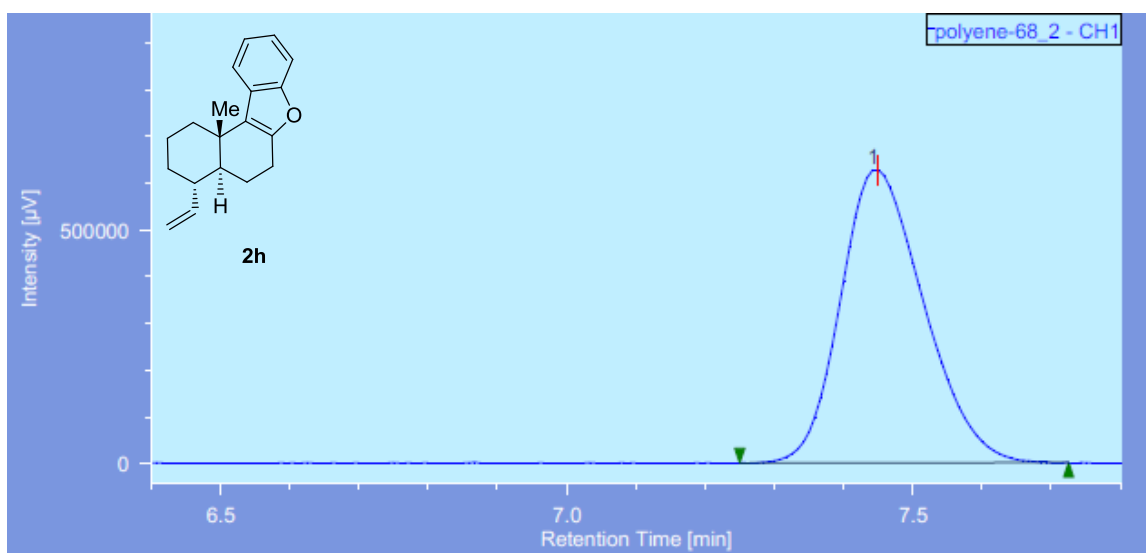

| # | Peak Name | CH | tR [min] | Area [ $\mu\text{V}\cdot\text{sec}$ ] | Height [ $\mu\text{V}$ ] | Area%   | Height% | Quantity | NTP   | Resolution | Symmetry Factor | Warning |
|---|-----------|----|----------|---------------------------------------|--------------------------|---------|---------|----------|-------|------------|-----------------|---------|
| 1 | Unknown   | 1  | 7.450    | 5233541                               | 625500                   | 100.000 | 100.000 | N/A      | 18237 | N/A        | 1.197           |         |

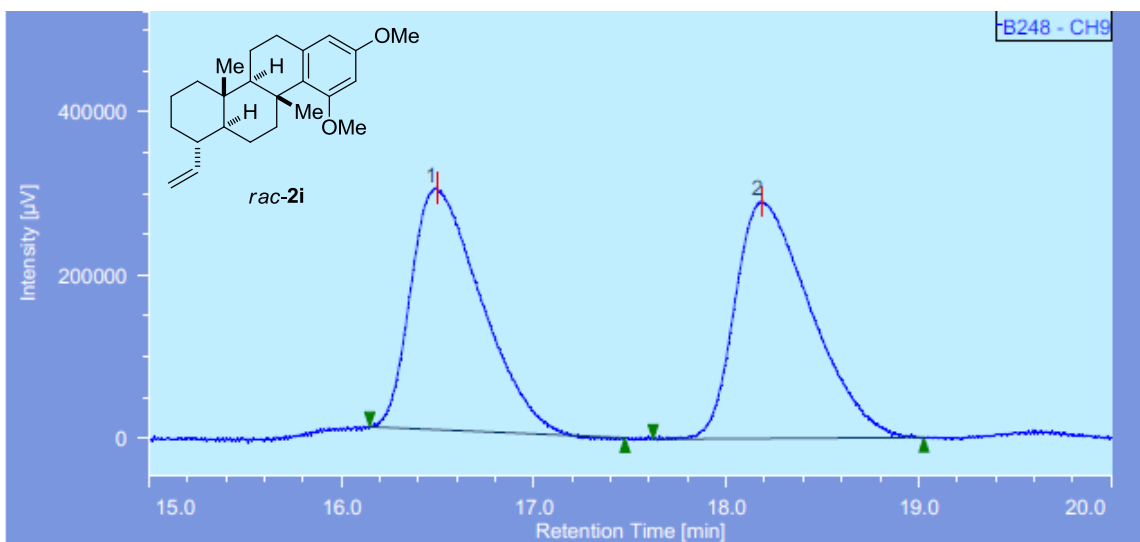

| # | Peak Name | CH | tR [min] | Area [ $\mu\text{V}\cdot\text{sec}$ ] | Height [ $\mu\text{V}$ ] | Area%  | Height% | Quantity | NTP   | Resolution | Symmetry Factor | Warning |
|---|-----------|----|----------|---------------------------------------|--------------------------|--------|---------|----------|-------|------------|-----------------|---------|
| 1 | Unknown   | 9  | 16.493   | 7509364                               | 295946                   | 48.592 | 50.396  | N/A      | 9405  | 2.414      | 1.558           |         |
| 2 | Unknown   | 9  | 18.187   | 7944571                               | 291297                   | 51.408 | 49.604  | N/A      | 10030 | N/A        | 1.531           |         |

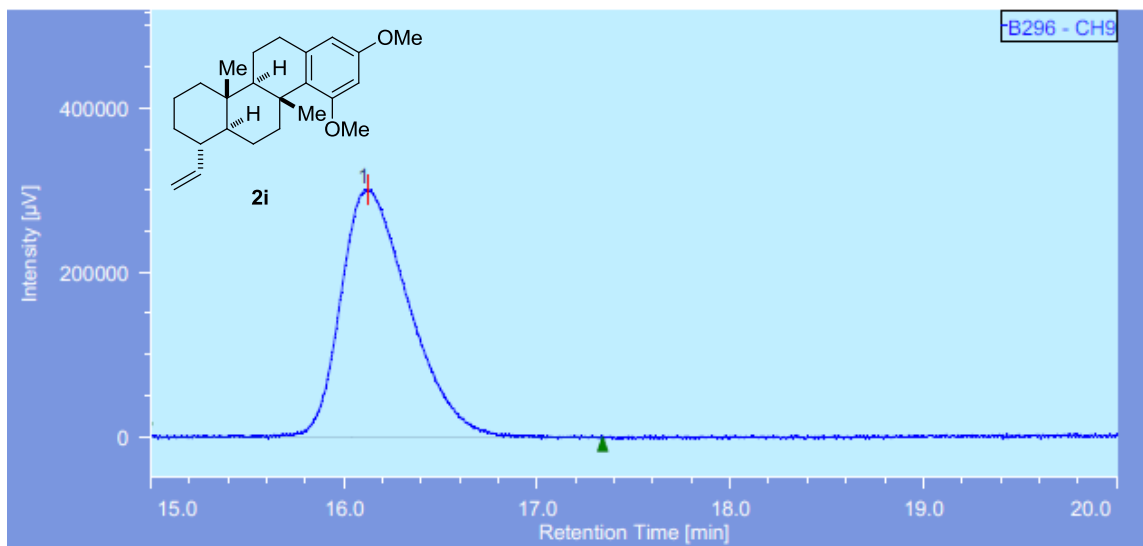

| # | Peak Name | CH | tR [min] | Area [ $\mu\text{V}\cdot\text{sec}$ ] | Height [ $\mu\text{V}$ ] | Area%   | Height% | Quantity | NTP  | Resolution | Symmetry Factor | Warning |
|---|-----------|----|----------|---------------------------------------|--------------------------|---------|---------|----------|------|------------|-----------------|---------|
| 1 | Unknown   | 9  | 16.127   | 7460288                               | 301169                   | 100.000 | 100.000 | N/A      | 9916 | N/A        | 1.393           |         |

# $^1\text{H}$ -NMR and $^{13}\text{C}$ -NMR Spectra of Products

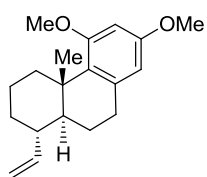**2a** $^1\text{H}$ -NMR: 400 MHz,  $\text{CDCl}_3$ 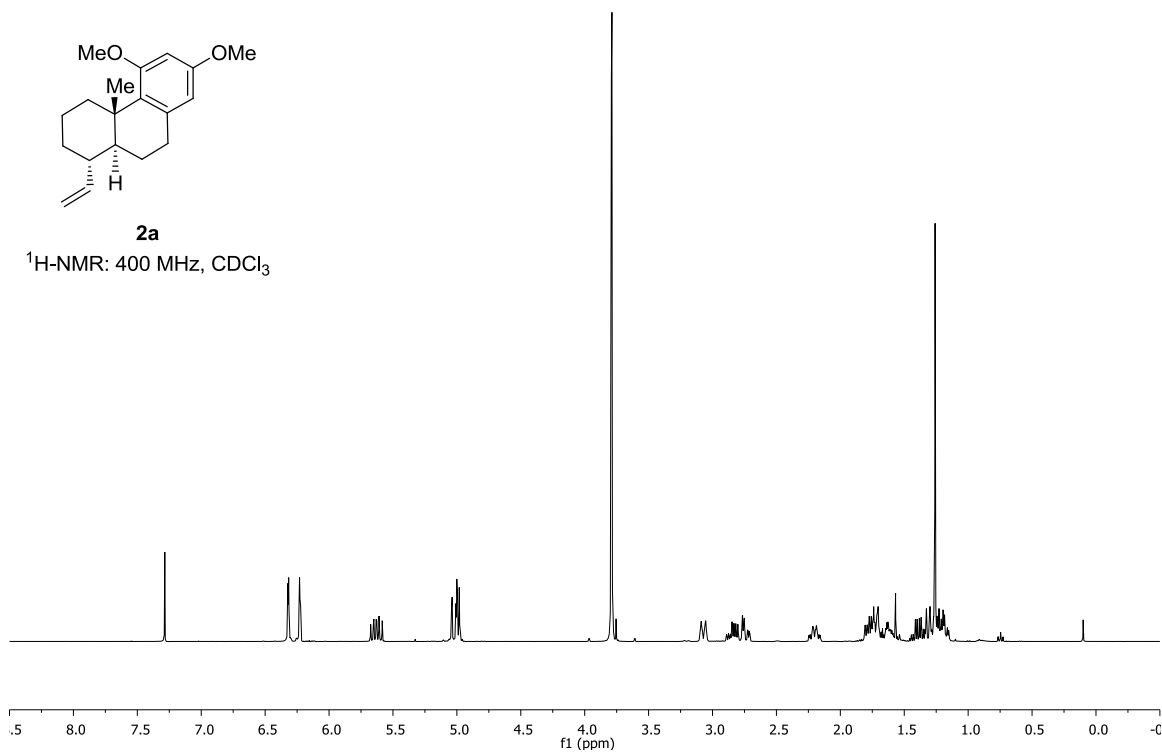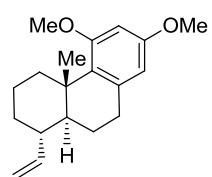**2a** $^{13}\text{C}$ -NMR: 100 MHz,  $\text{CDCl}_3$ 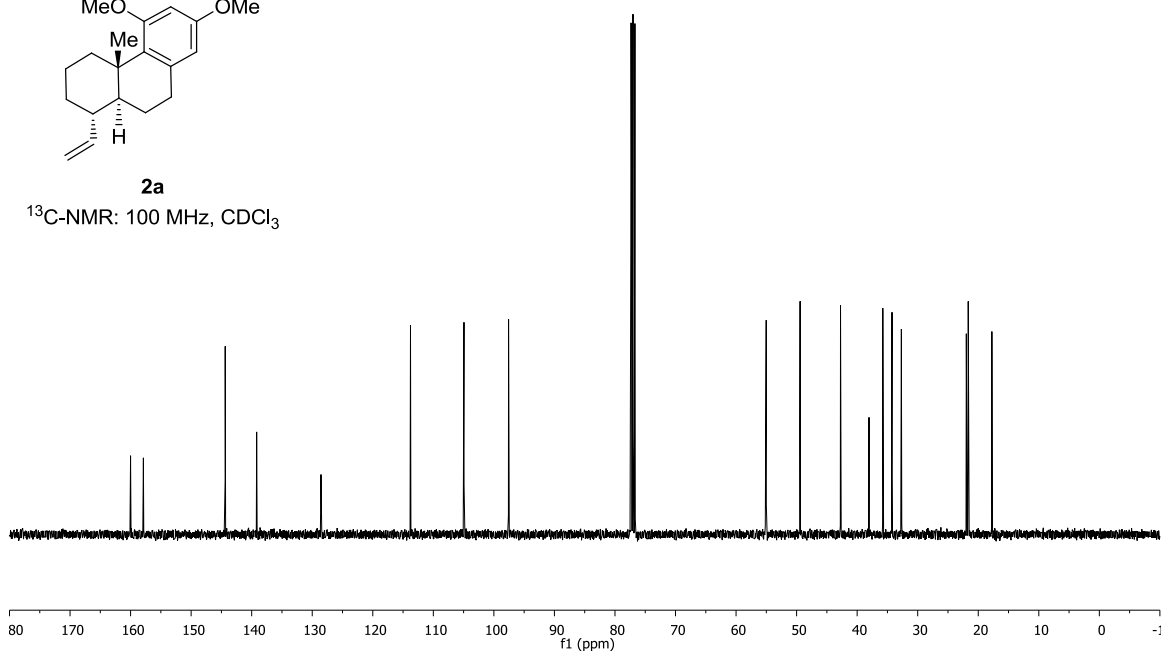

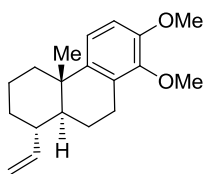**2b**<sup>1</sup>H-NMR: 400 MHz, CDCl<sub>3</sub>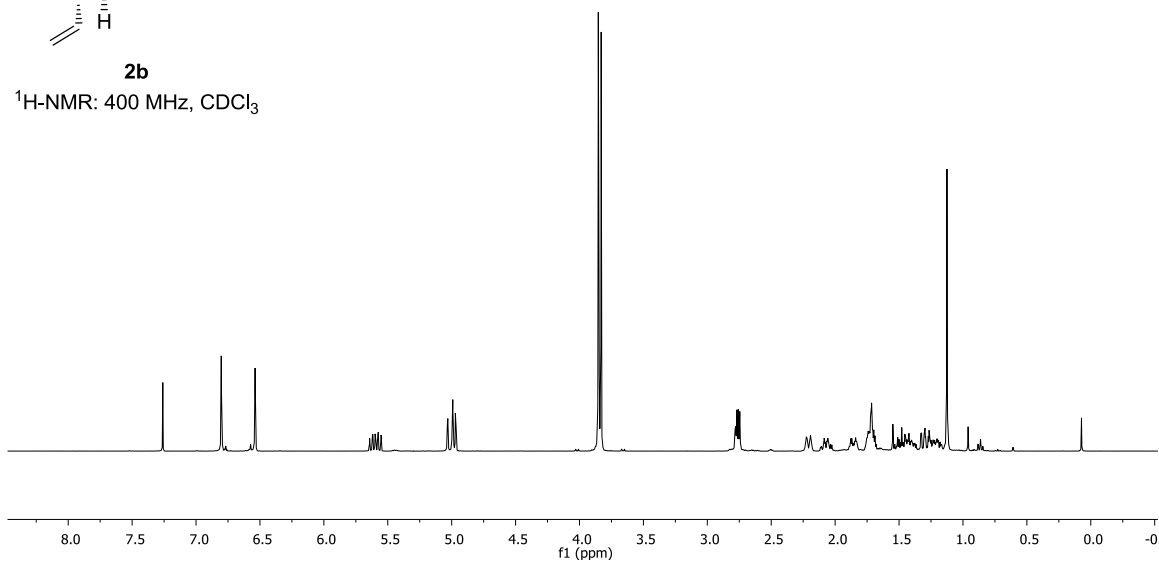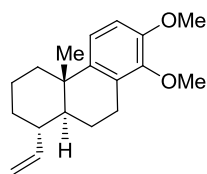**2b**<sup>13</sup>C-NMR: 100 MHz, CDCl<sub>3</sub>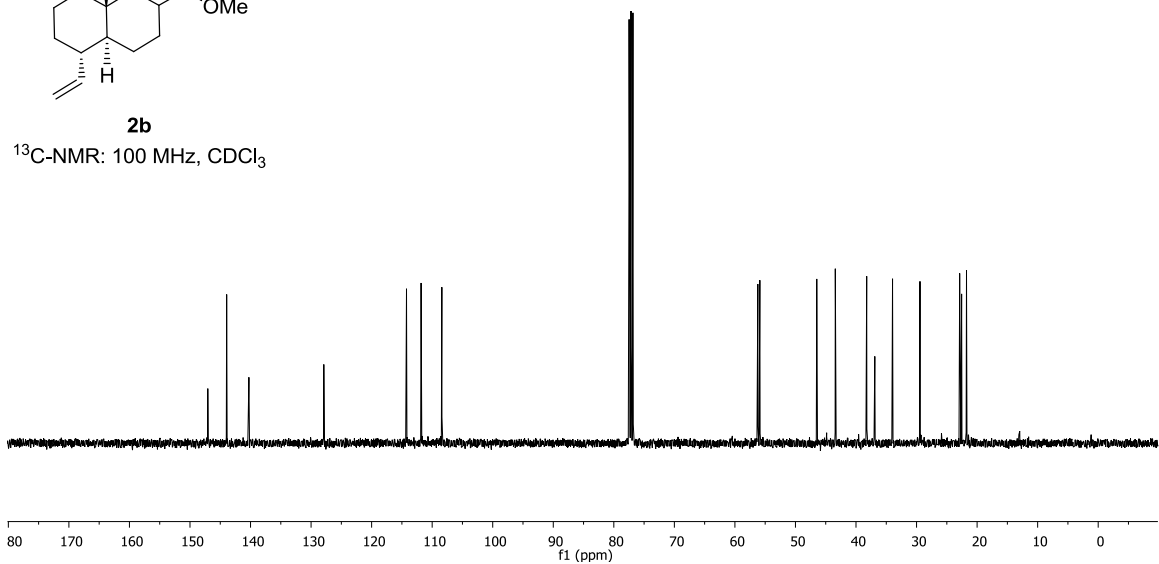

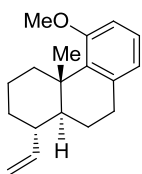**2c'**<sup>1</sup>H-NMR: 400 MHz, CDCl<sub>3</sub>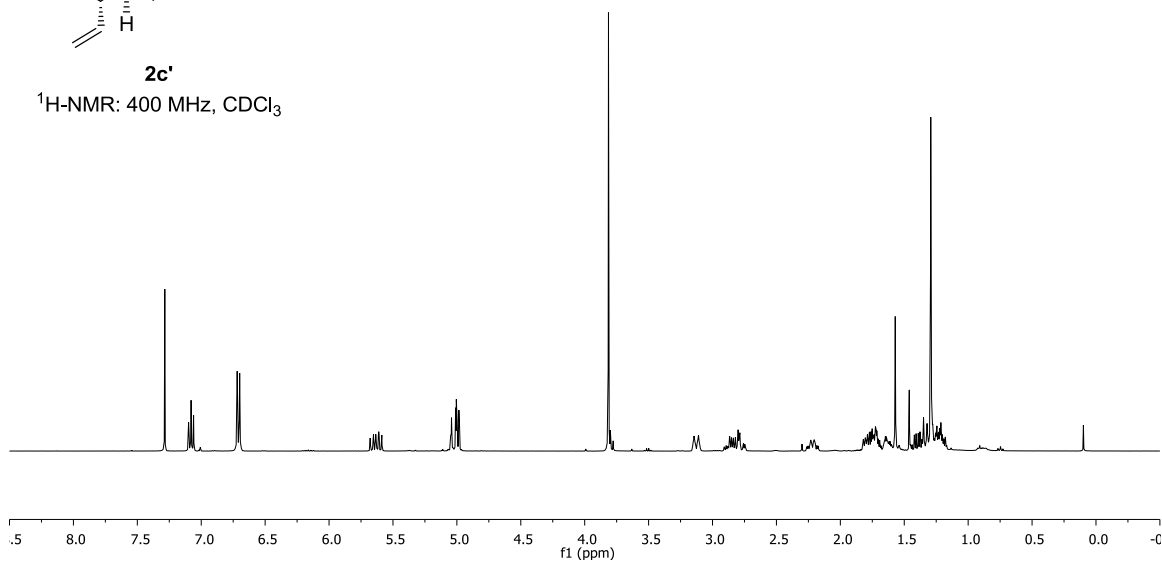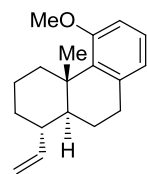**2c'**<sup>13</sup>C-NMR: 100 MHz, CDCl<sub>3</sub>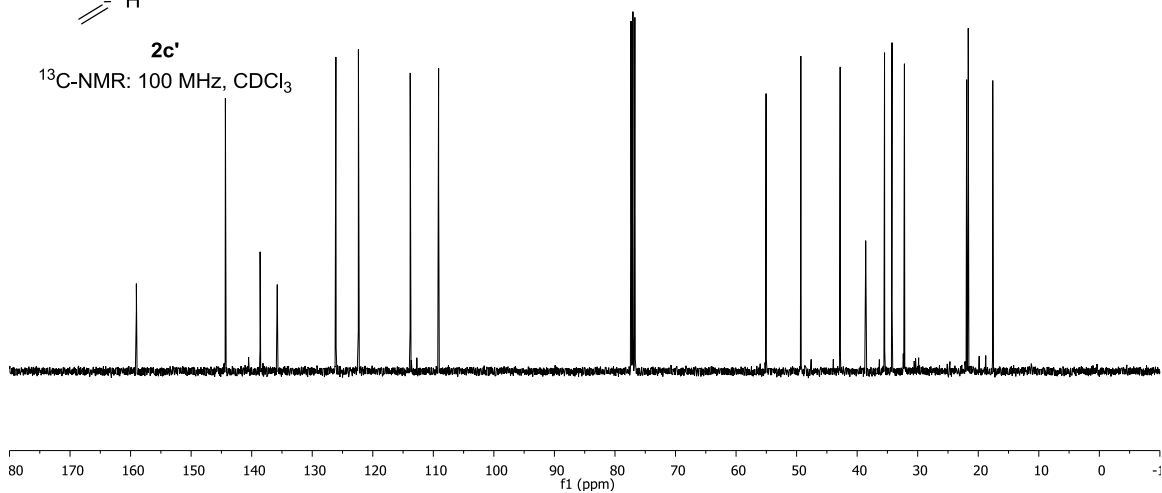

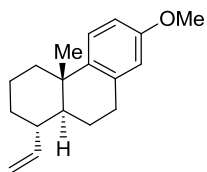**2c**<sup>1</sup>H-NMR: 400 MHz, CDCl<sub>3</sub>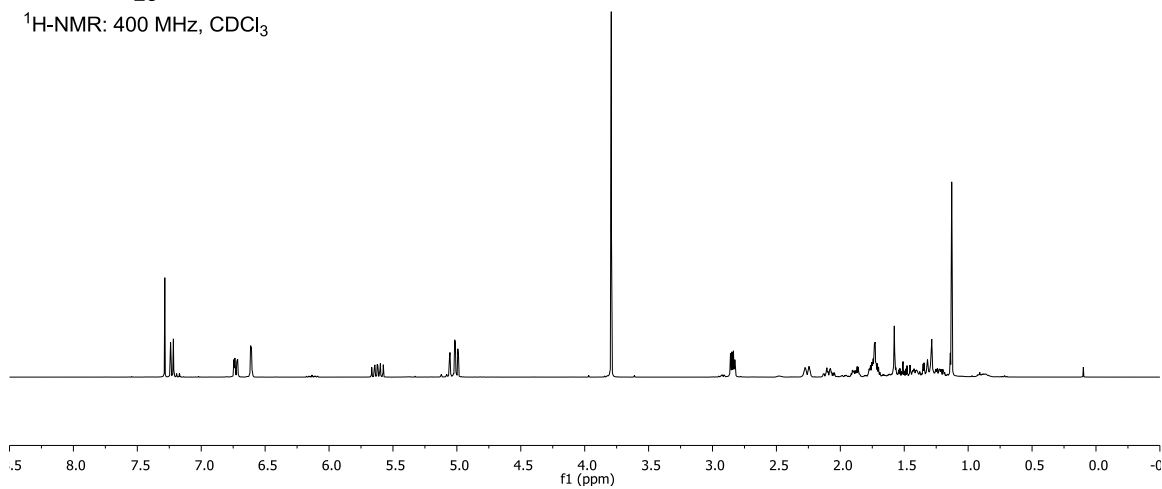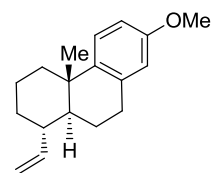**2c**<sup>13</sup>C-NMR: 100 MHz, CDCl<sub>3</sub>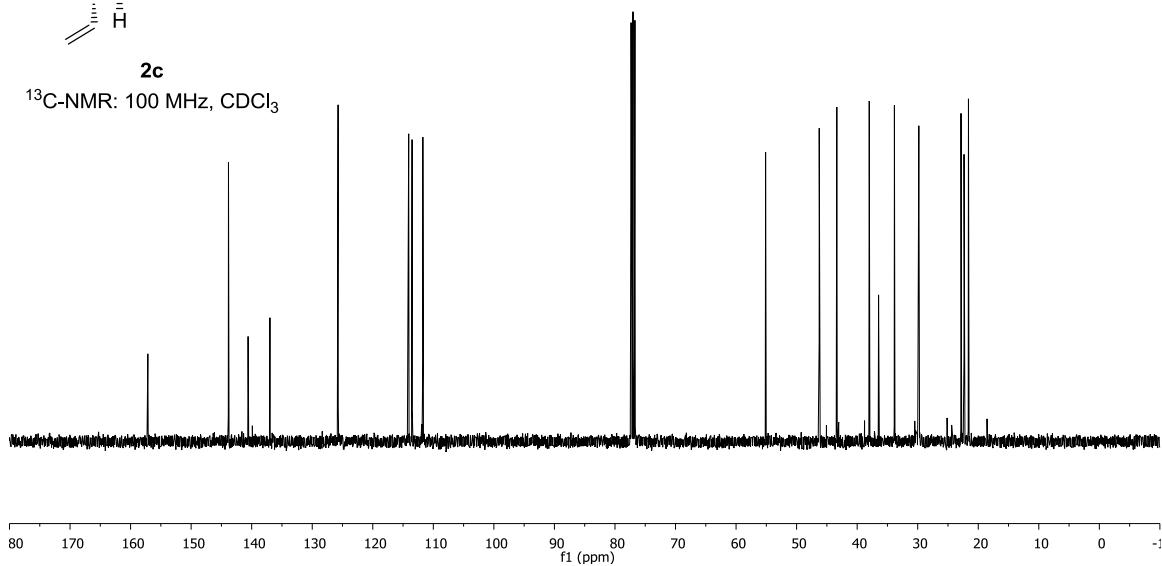

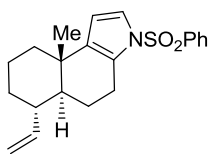**2d**<sup>1</sup>H-NMR: 400 MHz, CDCl<sub>3</sub>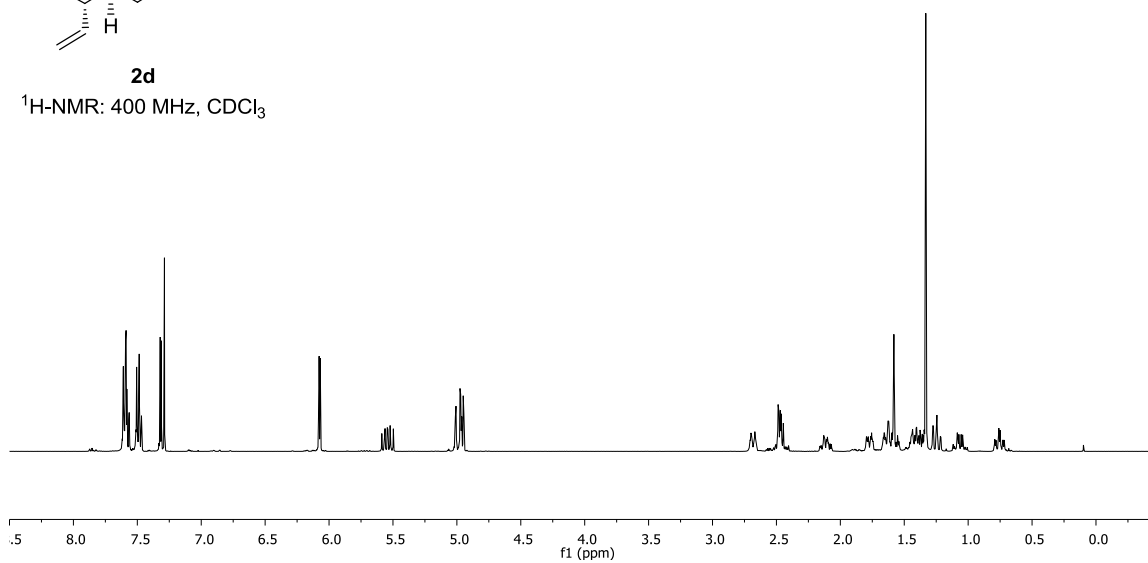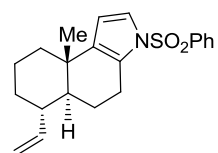**2d**<sup>13</sup>C-NMR: 100 MHz, CDCl<sub>3</sub>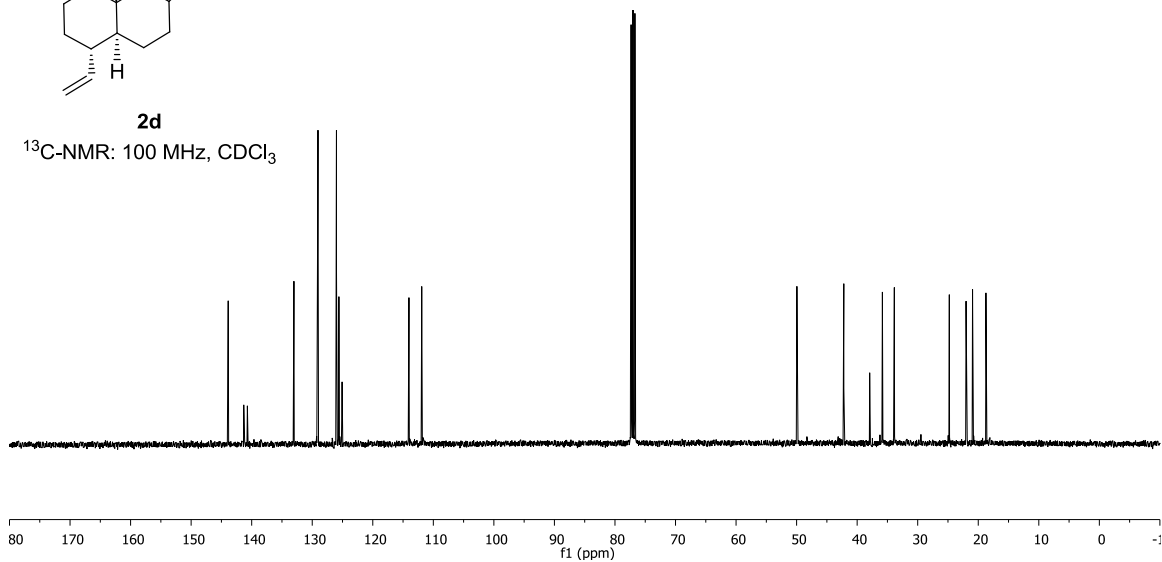

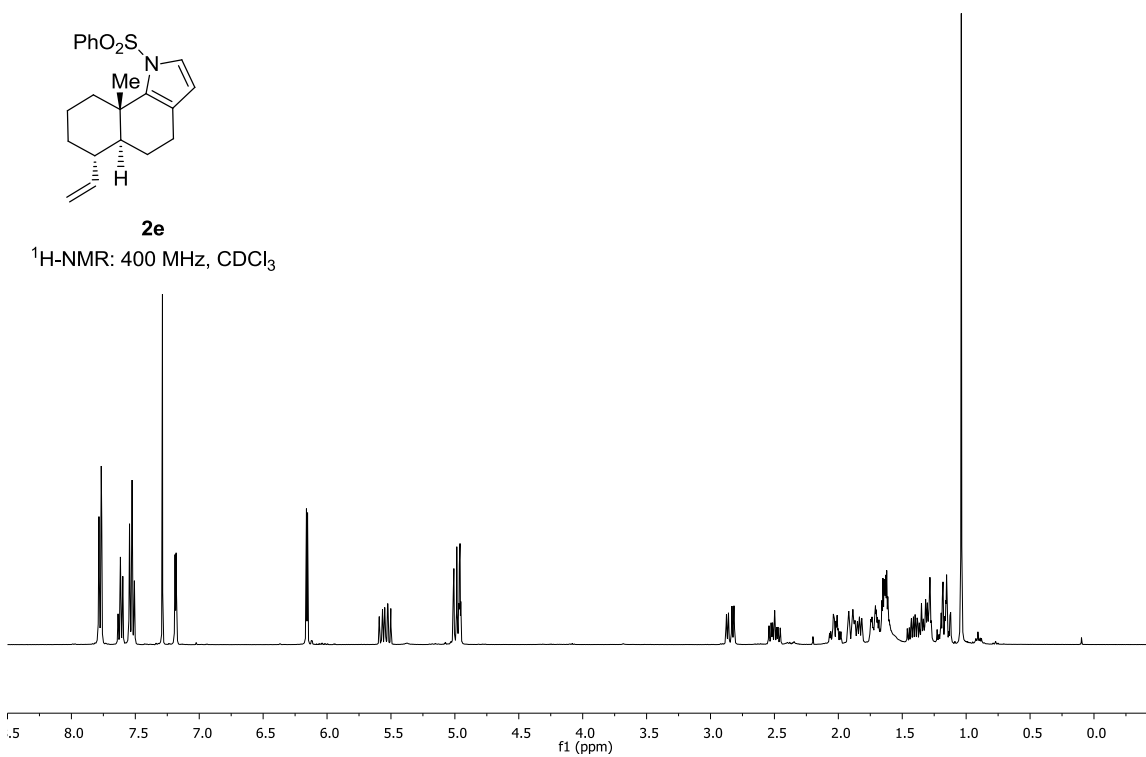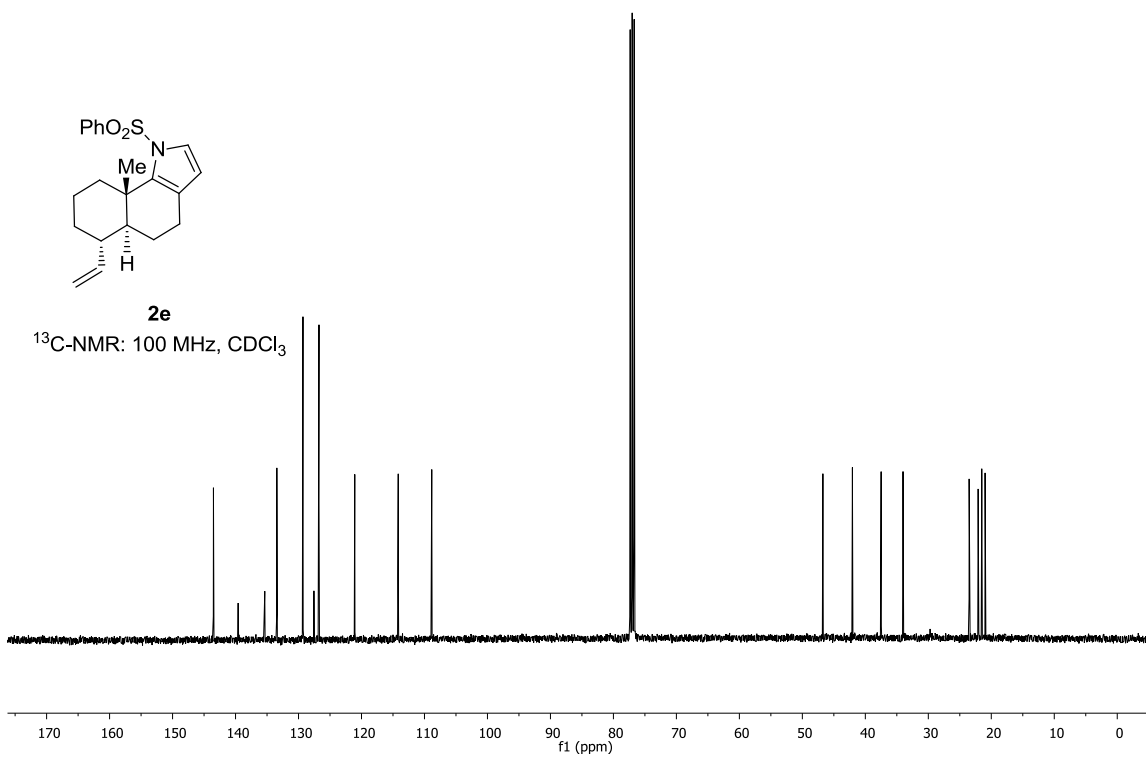



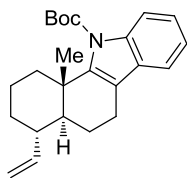**2f**<sup>1</sup>H-NMR: 400 MHz, CDCl<sub>3</sub>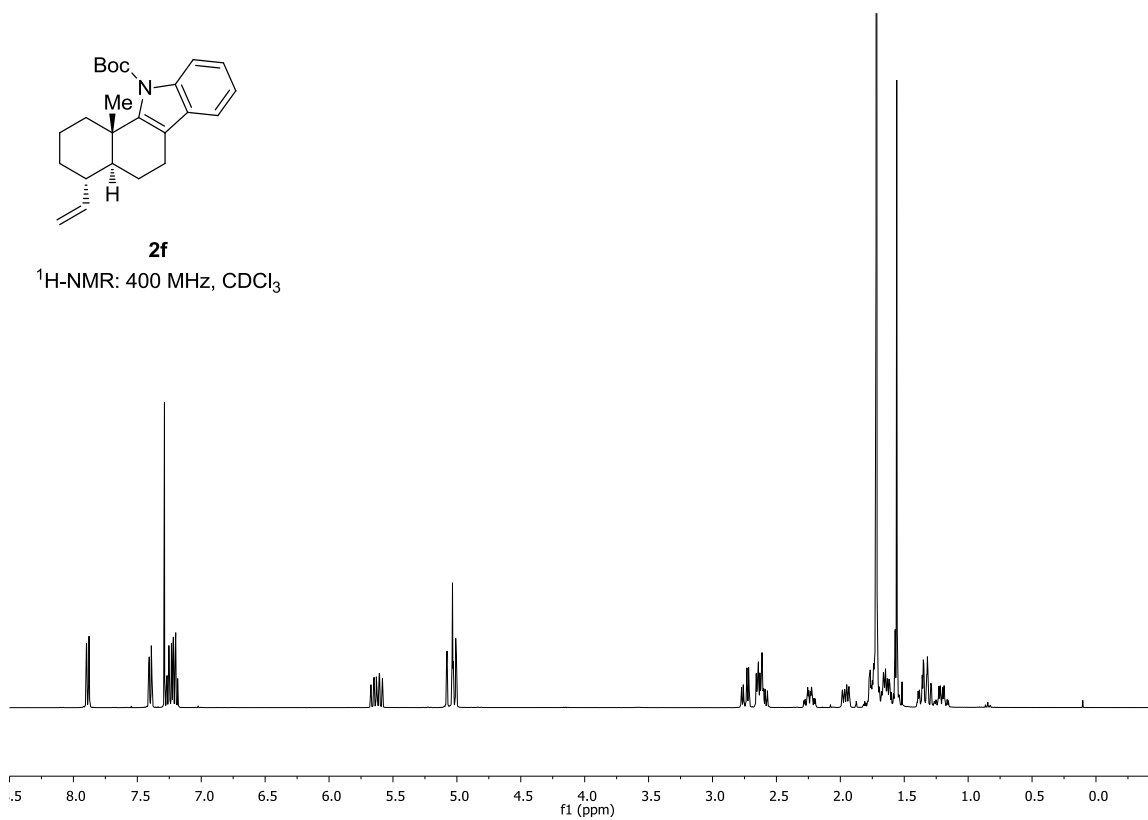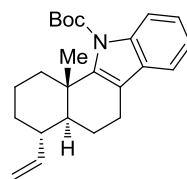**2f**<sup>13</sup>C-NMR: 100 MHz, CDCl<sub>3</sub>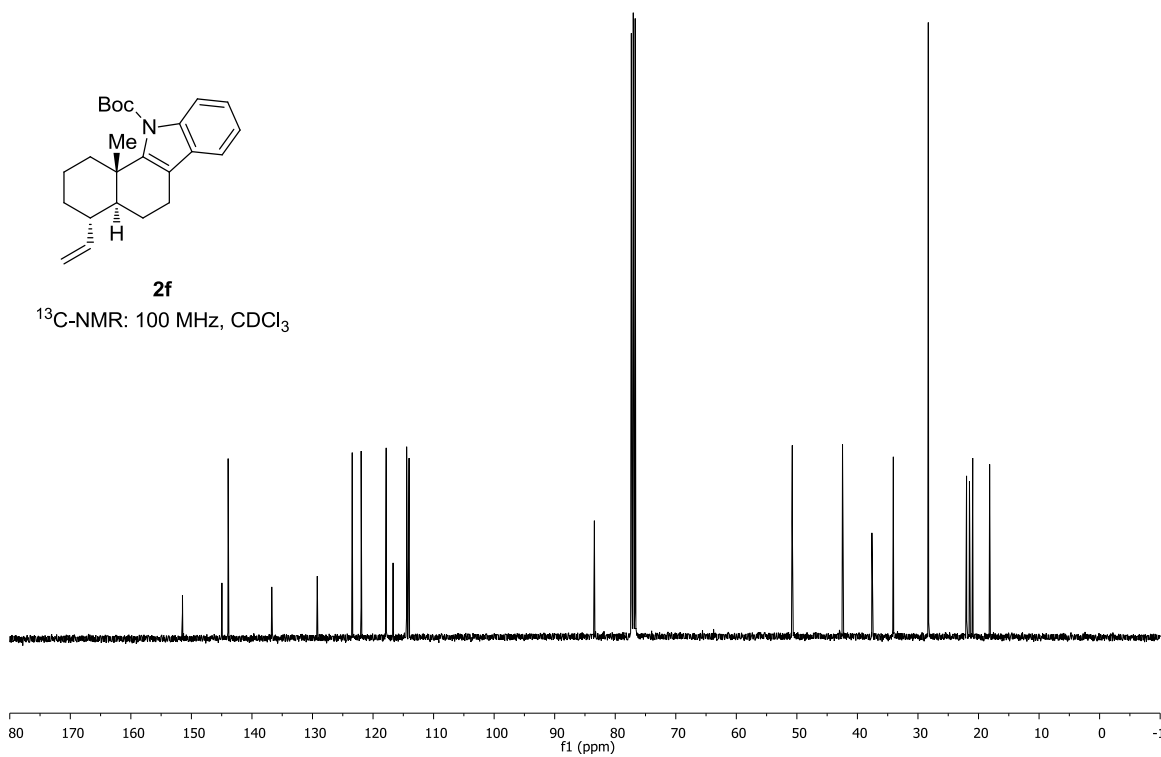

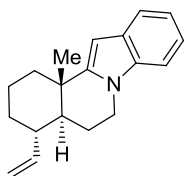**2g**<sup>1</sup>H-NMR: 400 MHz, CDCl<sub>3</sub>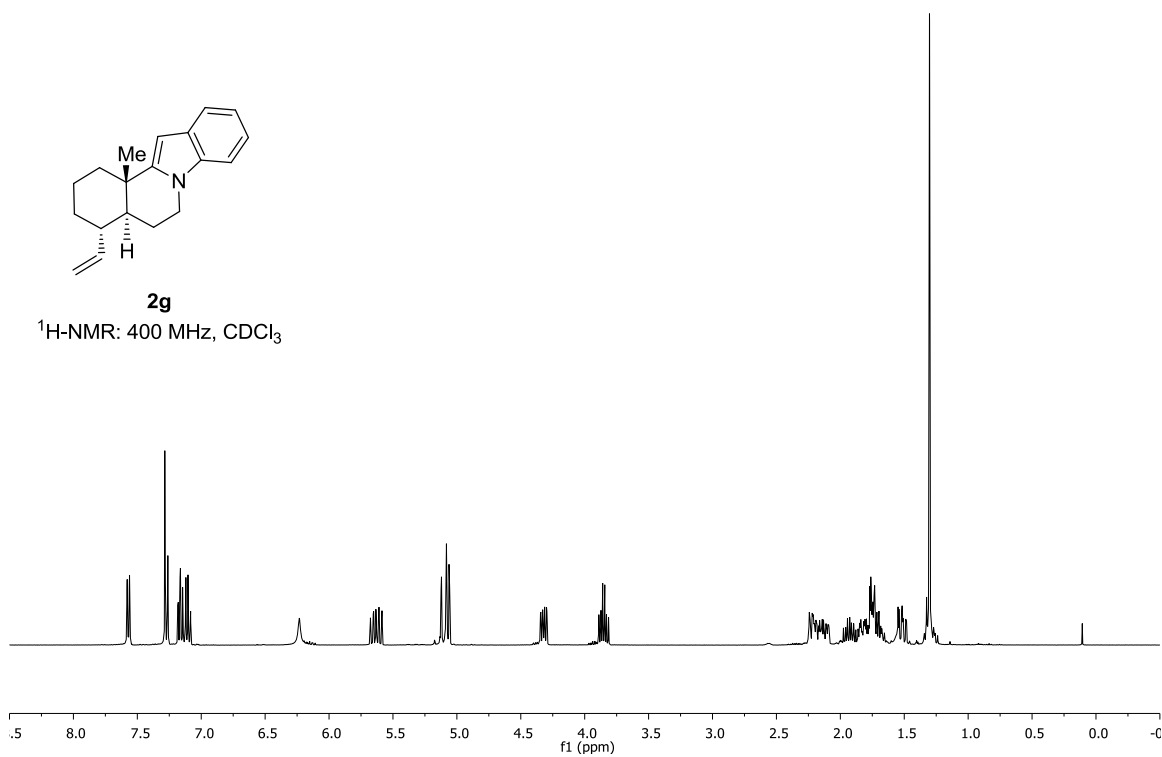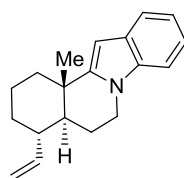**2g**<sup>13</sup>C-NMR: 100 MHz, CDCl<sub>3</sub>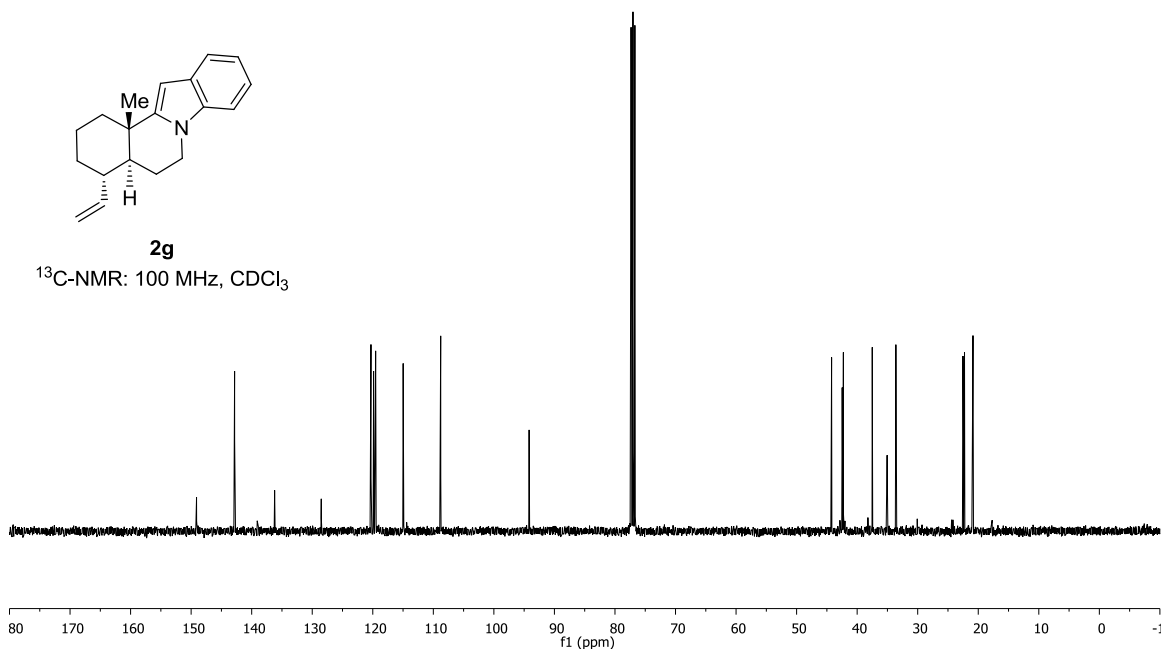

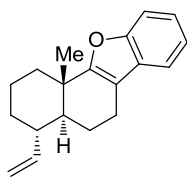**2h**<sup>1</sup>H-NMR: 400 MHz, CDCl<sub>3</sub>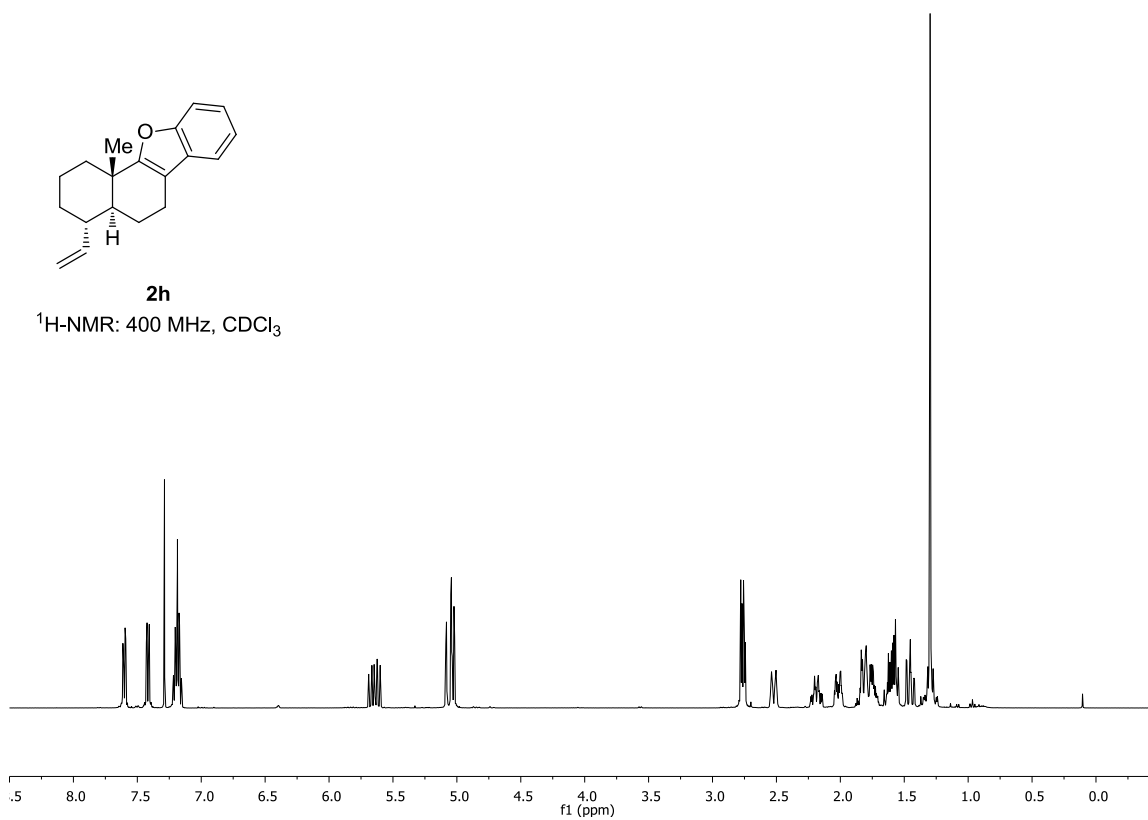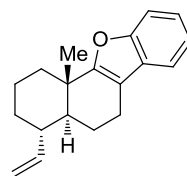**2h**<sup>13</sup>C-NMR: 100 MHz, CDCl<sub>3</sub>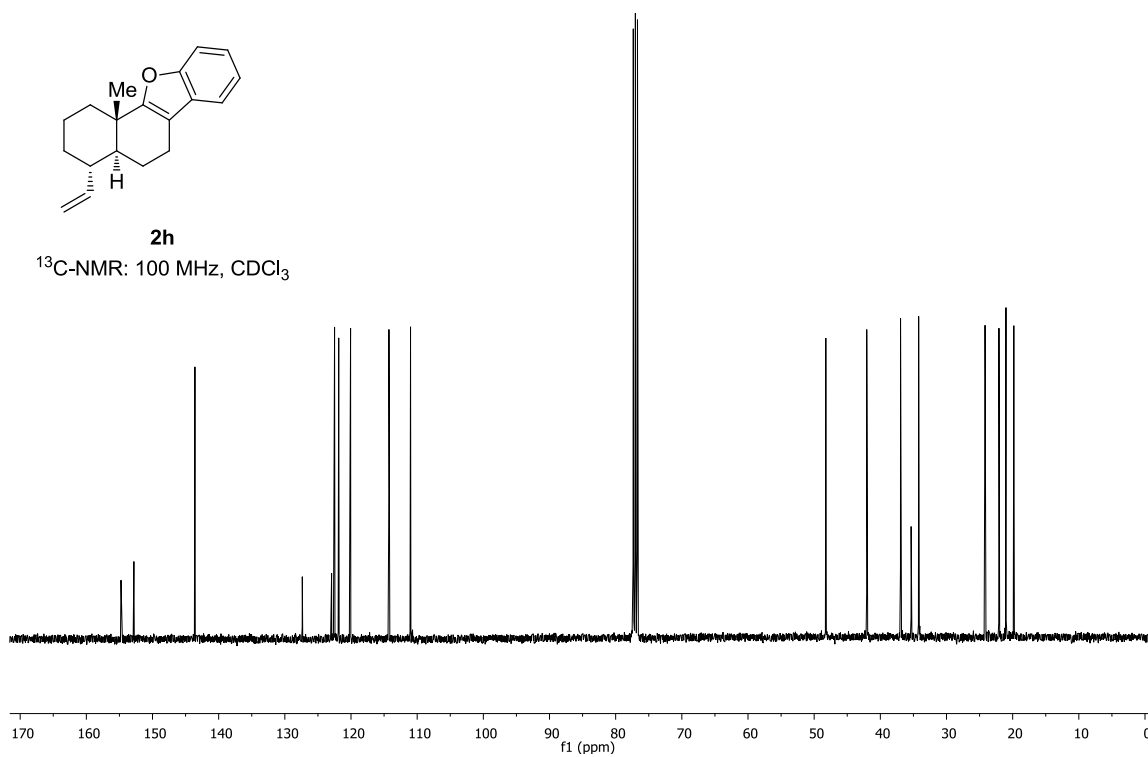

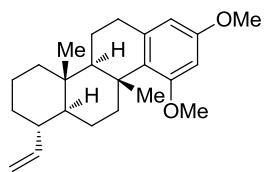**2i** $^1\text{H-NMR}$ : 400 MHz,  $\text{CDCl}_3$ 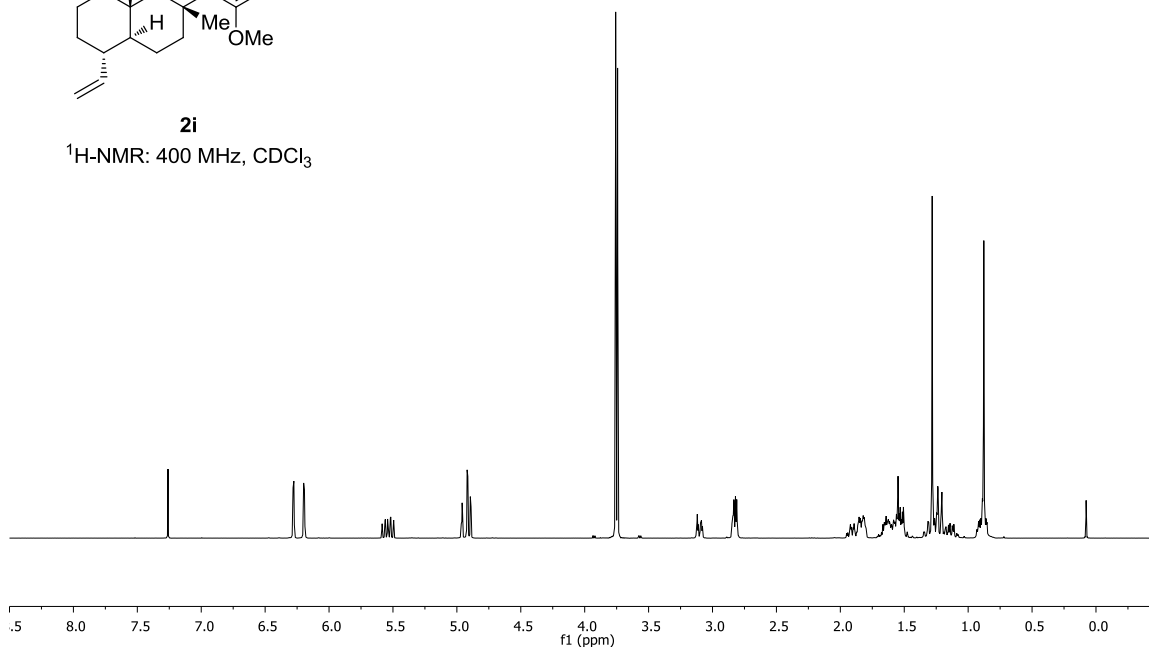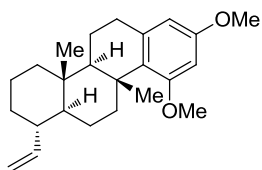**2i** $^{13}\text{C-NMR}$ : 100 MHz,  $\text{CDCl}_3$ 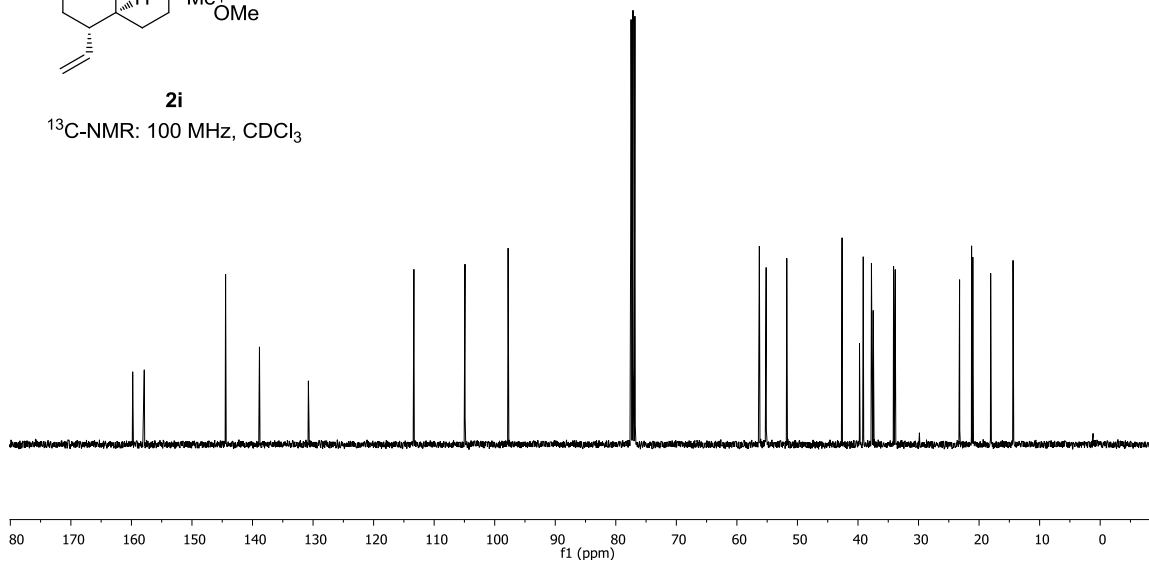

Supplement: Supplementary file 1 [file 4102045]
